# Supplementary material
Source: PubMed Central journal article supplement (PMC5074604)
Supplement: supp_pp.16.00129_PP2016-00129DR3_Supplemental_Material.pdf [file supp_pp.16.00129_PP2016-00129DR3_Supplemental_Material.pdf]

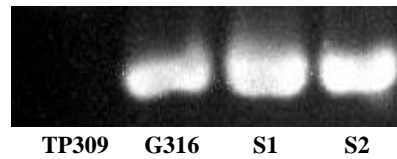

**Figure S1.** Genotyping of two transgene-silenced G316 plants, S1 and S2.

The *OsNPR1* transgene was detected by PCR using specific primers of transgenic construct listed in Table S2.

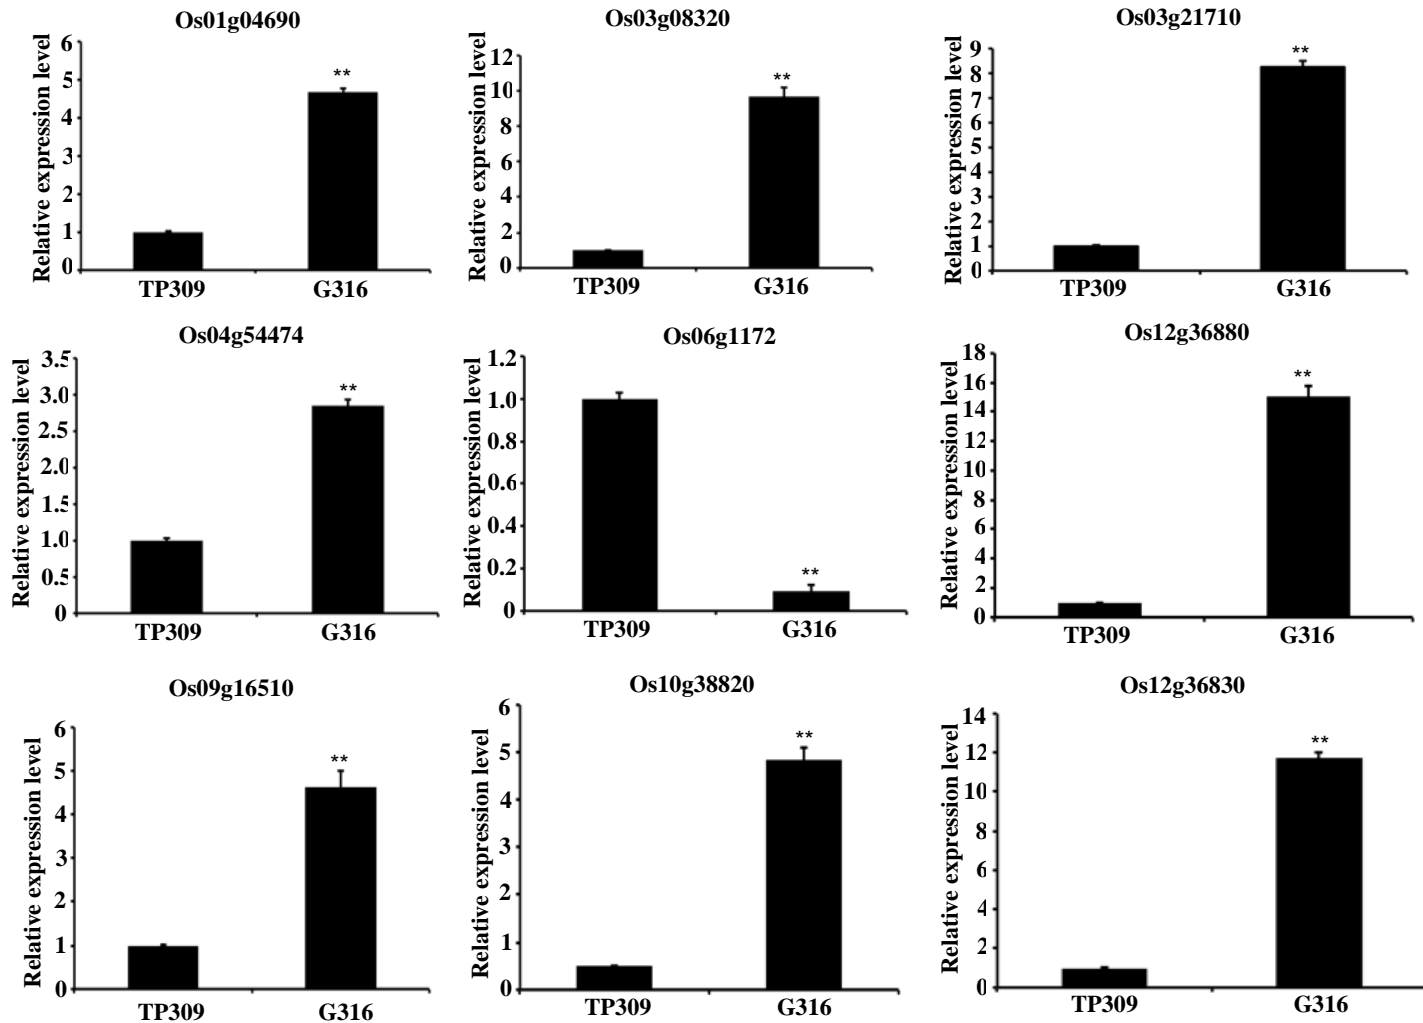

**Figure S2.** qRT-PCR validation of differentially expressed genes revealed by microarray assay.

RNA was extracted from the young uppermost internodes at heading stage. The rice *OsActin1* gene (Os03g50885) was used as an internal control. Primer sequences are listed in Table S2. Asterisks indicate significant difference in comparison with TP309 ( $P$ -value < 0.01 by Student's  $t$ -test).

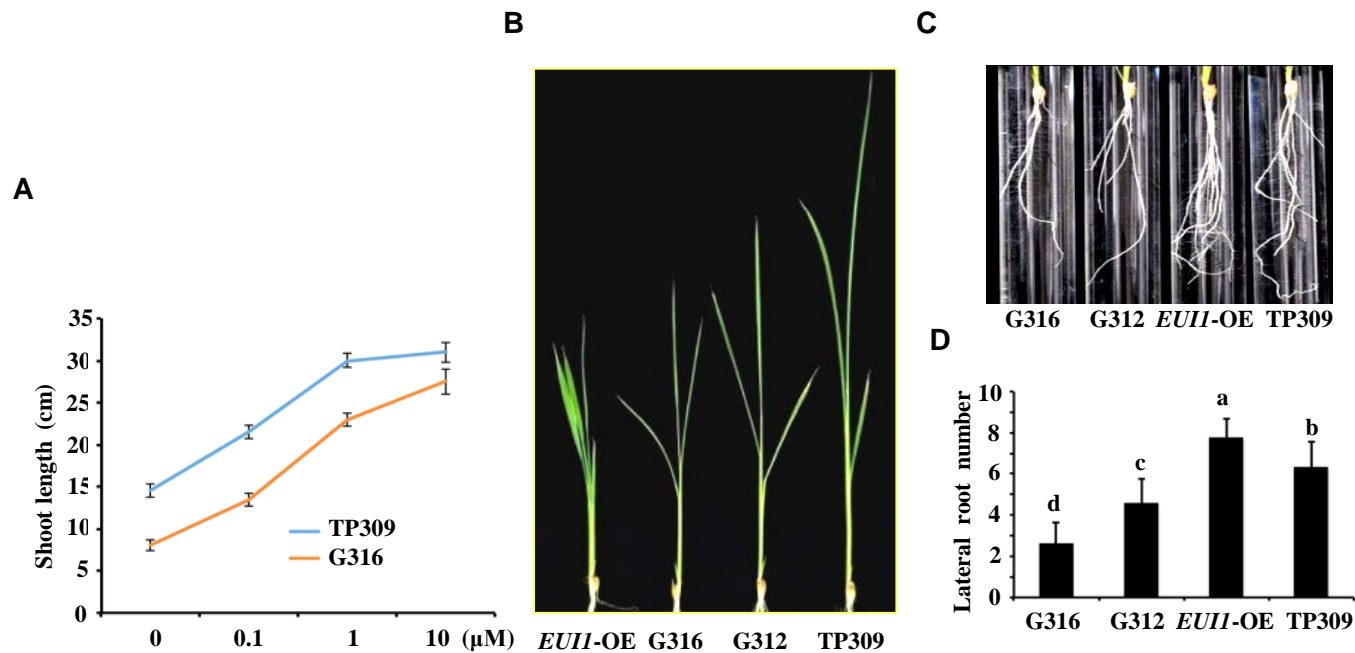

**Figure S3.** *OsNPRI* overexpression has no effect on GA response.

A, *OsNPRI*-OX plants (G316) were sensitive to exogenous GA similar to the wild-type TP309. Seeds after germinating were grown in 1/2 MS medium with different concentrations of GA<sub>3</sub>. The shoot lengths were measured at 17 day after treatment (n ≥ 24). B and C, Shoot and root morphology of 3-week-old seedlings. *EUII*-OE is the *OsEUII* overexpression line in TP309 background (Zhu et al., 2006), used as a GA deficient control. D, Statistics analysis of numbers of lateral roots. Different letters indicate significantly different values at *P*-value < 0.05 (n = 24, ANOVA followed by Duncan's multiple range test).

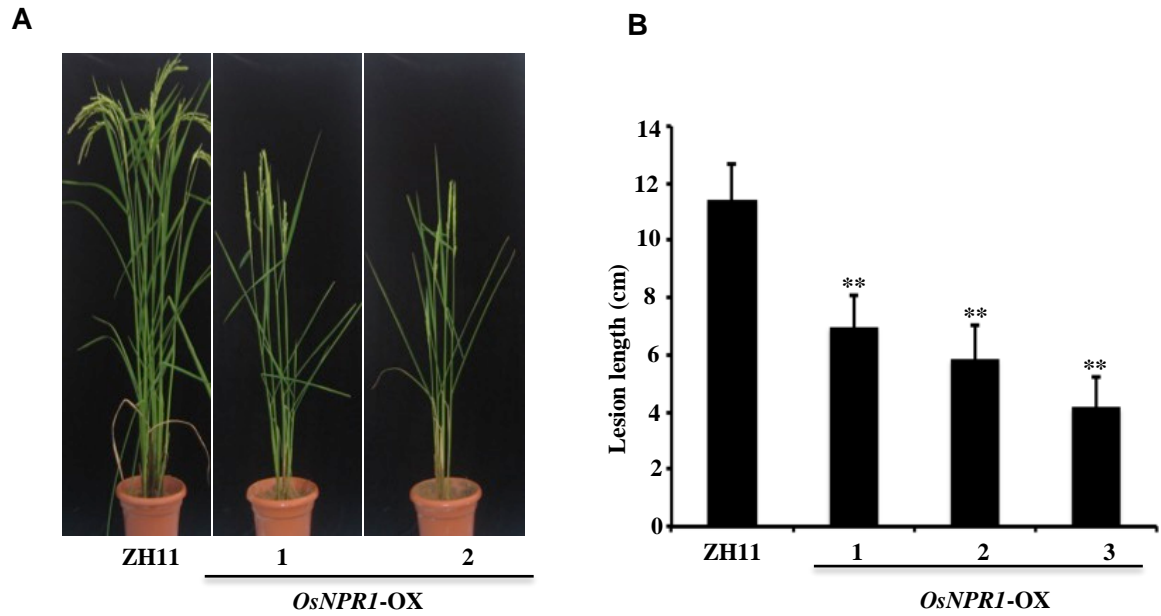

**Figure S4.** Generation of *OsNPRI* overexpression lines in ZH11.

A, Phenotype of heading plants of the representative transgenic lines in comparison with the wild-type ZH11. B, Statistic analysis of lesion lengths after inoculated with *Xoo* strain PXO99A. Asterisks indicate significant difference in comparison with TP309 ( $n \geq 20$ ,  $P$ -value  $< 0.01$  by Student's  $t$ -test).

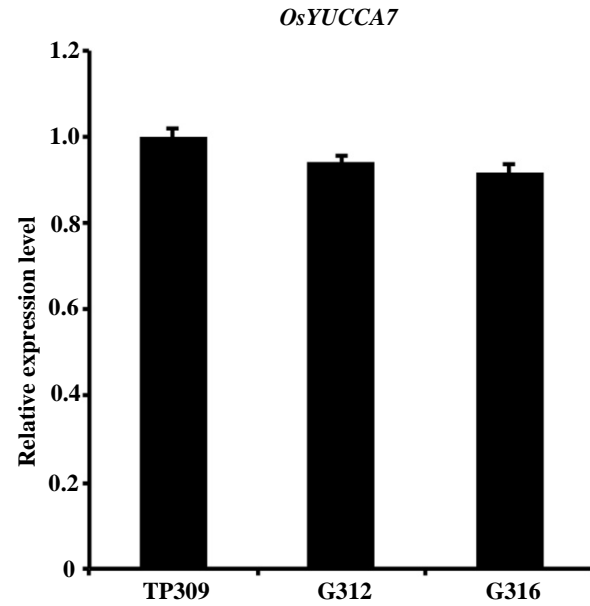

**Figure S5.** *OsYUCCA7* expression levels at seedling stage.

RNA was extracted from 3-week-old seedlings of TP309, G312 and G316. Statistic analysis indicated that the expression level of *OsYUCCA7* in G312 and G316 were not significantly changed in comparison with that in TP309.

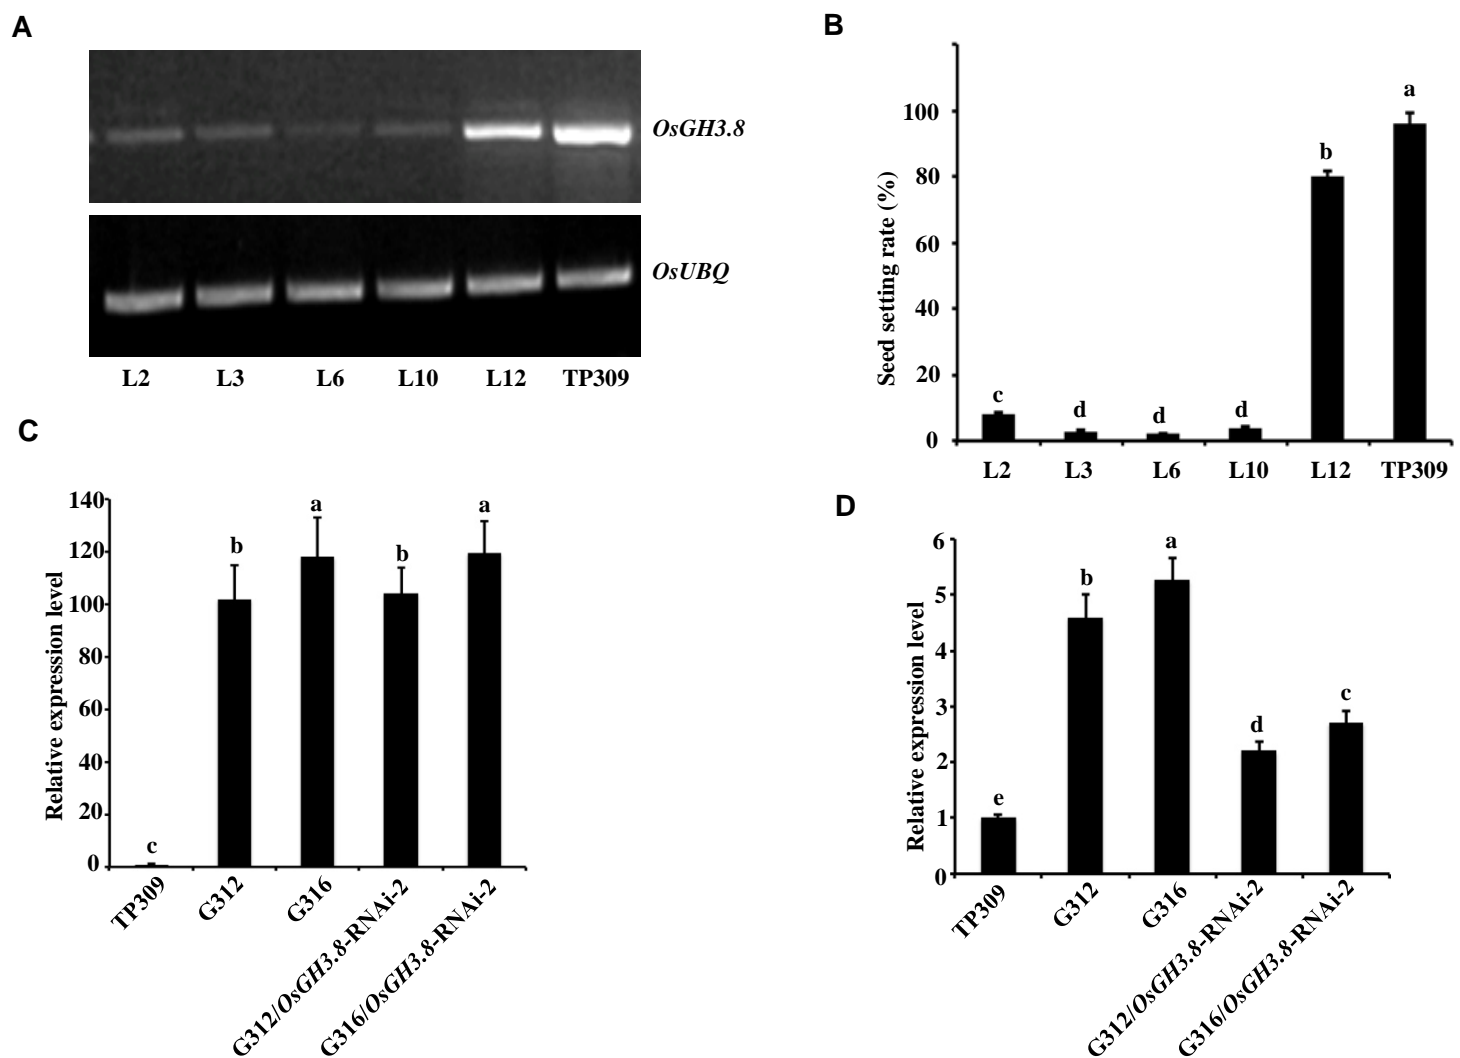

**Figure S6.** Generation of *OsNPR1*-OX/*OsGH3.8*-RNAi.

A, Expression levels of *OsGH3.8* were examined by semi-quantitative PCR (38cycles) in *OsGH3.8*-RNAi lines L2, L3, L6, L10 and L12, compared with the wild-type TP309. RNA was extracted from the young uppermost internodes at heading stage. The rice ubiquitin gene (*Os03g13170*) was used as an internal control (25 cycles). B, Statistic analysis of seed setting rates of *OsGH3.8*-RNAi lines. Data collected from transgene plants (T1 generation). C and D, qRT-PCR analysis of *OsNPR1* (C) and *OsGH3.8* (D) in the wild-type (TP309), *OsNPR1*-OX (G312, G316) and *OsNPR1*-OX/*OsGH3.8*-RNAi double transgene line. RNA was extracted from the young uppermost internodes at heading stage. The rice *OsActin1* gene (*Os03g50885*) was used as an internal control. Note that the expression level of *OsGH3.8* was only partially decreased in *OsNPR1*-OX/*OsGH3.8*-RNAi compared with *OsNPR1*-OX. Different letters indicate significantly difference ( $P$ -value < 0.05, ANOVA followed by Duncan's multiple range test).
