# Supplementary material
Source: PubMed Central journal article supplement (PMC5074604)
Supplement: supp_pp.16.00129_PP2016-00129DR3_Table_S1.pdf [file supp_pp.16.00129_PP2016-00129DR3_Table_S1.pdf]

**Table S1 Differentially expressed genes revealed by microarray between TP309 and G316**

| Probe set            | ID | Gene ID        | Gene product name                                               | Fold     |          |          |
|----------------------|----|----------------|-----------------------------------------------------------------|----------|----------|----------|
|                      |    |                |                                                                 | Repeat 1 | Repeat 2 | Repeat 3 |
| Os.3415.1.S1_at      |    | LOC_Os10g39680 | CHIT14 - Chitinase family protein precursor, expressed          | 3.6      | 3        | 1        |
| Os.49305.1.S1_at     |    | LOC_Os01g51754 | alpha-amylase precursor, putative, expressed                    | -2.6     | -1.3     | -1.1     |
| Os.1191.1.S1_at      |    | LOC_Os03g04060 | CHIT16 - Chitinase family protein precursor, expressed          | 3.1      | 3.9      | 1.3      |
| Os.47792.1.S1_at     |    | LOC_Os02g01590 | glycosyl hydrolases, putative, expressed                        | -1.4     | -1.5     | -2.9     |
| Os.10926.1.S1_at     |    | LOC_Os07g14850 | CESA6 - cellulose synthase, expressed                           | 1.4      | 1.7      | 1.9      |
| Os.15705.1.S1_x_at   |    | LOC_Os05g43530 | CSLC7 - cellulose synthase-like family C, expressed             | 2.1      | 2        | 2        |
| OsAffx.20285.2.S1_at |    | LOC_Os05g43530 | CSLC7 - cellulose synthase-like family C, expressed             | 2.2      | 1.8      | 2.3      |
| OsAffx.6015.1.S1_at  |    | LOC_Os08g33740 | CSLA11 - cellulose synthase-like family A, expressed            | 2.7      | 2.4      | 4.8      |
| Os.25614.1.S1_at     |    | LOC_Os06g02180 | CSLD2 - cellulose synthase-like family D, expressed             | 1.4      | 1        | 1.3      |
| Os.17509.1.S1_at     |    | LOC_Os02g50490 | endoglucanase, putative, expressed                              | 1.6      | 1.6      | 2.3      |
| Os.54551.1.S1_at     |    | LOC_Os09g23084 | endoglucanase, putative, expressed                              | 2.4      | 1.1      | 1.7      |
| Os.55554.1.S1_at     |    | LOC_Os08g38270 | fasciclin domain containing protein, expressed                  | 2.3      | 1.4      | 1.3      |
| Os.10579.1.S1_at     |    | LOC_Os08g02700 | fructose-bisphosphate aldolase isozyme, putative, expressed     | 1.6      | 1.3      | 1.2      |
| Os.6776.1.S1_at      |    | LOC_Os07g35480 | glucan endo-1,3-beta-glucosidase precursor, putative, expressed | 4.1      | 2.5      | 3.4      |
| Os.51883.1.S1_at     |    | LOC_Os03g45390 | glucan endo-1,3-beta-glucosidase precursor, putative, expressed | -2.4     | -2.5     | -1.6     |
| OsAffx.25749.1.S1_at |    | LOC_Os03g57880 | glucan endo-1,3-beta-glucosidase precursor, putative, expressed | 2        | 1.6      | 2.6      |
| Os.24051.1.S1_at     |    | LOC_Os04g33640 | glycosyl hydrolases family 17, putative, expressed              | 1.7      | 4.2      | 1.3      |
| Os.24051.2.S1_at     |    | LOC_Os04g33640 | glycosyl hydrolases family 17, putative, expressed              | 2.8      | 2.4      | 1.7      |
| Os.47778.1.A1_s_at   |    | LOC_Os04g33640 | glycosyl hydrolases family 17, putative, expressed              | 3.7      | 2.4      | 2.5      |
| Os.4159.1.S1_at      |    | LOC_Os01g51570 | glycosyl hydrolases family 17, putative, expressed              | 4.4      | 5.2      | 3.5      |

|                      |                |                                                                                            |     |     |     |
|----------------------|----------------|--------------------------------------------------------------------------------------------|-----|-----|-----|
| Os.18609.1.S1_at     | LOC_Os12g03720 | glucosamine--fructose-6-phosphate aminotransferase 1, putative, expressed                  | 2.3 | 1.3 | 2   |
| Os.13993.1.S1_at     | LOC_Os08g33720 | lactate/malate dehydrogenase, putative, expressed                                          | 1   | 1.4 | 1.8 |
| Os.7930.1.S1_x_at    | LOC_Os08g37370 | mitochondrial carrier protein, putative, expressed                                         | 1.6 | 1   | 1.3 |
| Os.17741.1.S1_at     | LOC_Os01g22900 | neutral/alkaline invertase, putative, expressed                                            | 1   | 1.4 | 2.3 |
| Os.27505.1.S1_at     | LOC_Os01g57854 | pectinesterase, putative, expressed                                                        | 1.6 | 1.9 | 2.2 |
| Os.4683.1.S1_at      | LOC_Os05g39320 | thiamine pyrophosphate enzyme, C-terminal TPP binding domain containing protein, expressed | 3.9 | 4.1 | 6.6 |
| Os.29866.1.S1_at     | LOC_Os01g52530 | phosphoribosyl transferase, putative, expressed                                            | 2.2 | 2.3 | 2.4 |
| Os.5016.1.S1_at      | LOC_Os03g55070 | UDP-glucose 6-dehydrogenase, putative, expressed                                           | 2.7 | 2   | 1.7 |
| Os.10473.1.S1_at     | LOC_Os12g25690 | UDP-glucose 6-dehydrogenase, putative, expressed                                           | 1.5 | 1.1 | 1.2 |
| Os.32890.1.S1_at     | LOC_Os11g47600 | glycosyl hydrolase, putative, expressed                                                    | 3.4 | 6.6 | 3.5 |
| Os.172.1.S1_a_at     | LOC_Os11g47500 | glycosyl hydrolase, putative, expressed                                                    | 3.3 | 5.1 | 4.8 |
| OsAffx.27816.1.S1_at | LOC_Os06g25010 | glycosyl hydrolase, putative, expressed                                                    | 1.6 | 1.9 | 2.3 |
| Os.28030.1.S1_at     | LOC_Os06g48160 | glycosyl hydrolases family 16, putative, expressed                                         | 4   | 4.4 | 1.9 |
| Os.25564.1.S1_at     | LOC_Os02g46910 | glycosyl hydrolases family 16, putative, expressed                                         | 1.9 | 2   | 1   |
| Os.6139.1.S1_at      | LOC_Os08g34580 | trehalose-6-phosphate synthase, putative, expressed                                        | 2.5 | 1.2 | 1.9 |
| Os.6092.1.S1_at      | LOC_Os02g44230 | CPuORF22 - conserved peptide uORF-containing transcript, expressed                         | 2.7 | 4   | 2.2 |
| Os.15026.1.S1_at     | LOC_Os09g37540 | uncharacterized protein PA4923, putative, expressed                                        | 6.4 | 3.7 | 2.5 |
| Os.9848.1.S1_at      | LOC_Os05g10650 | 6-phosphofructokinase, putative, expressed                                                 | 2.6 | 4   | 2.4 |
| Os.9534.1.S1_at      | LOC_Os01g65830 | acyl-desaturase, chloroplast precursor, putative, expressed                                | 4.6 | 4.9 | 5.5 |
| Os.8714.1.S1_at      | LOC_Os02g52610 | xyloglucan fucosyltransferase, putative, expressed                                         | 1.3 | 1.5 | 1.2 |
| Os.51937.1.S1_a_at   | LOC_Os07g09670 | galactosyltransferase family protein, putative, expressed                                  | 4.6 | 2.2 | 3   |
| OsAffx.13544.1.S1_at | LOC_Os03g58900 | galactosyltransferase family protein, putative, expressed                                  | 4.7 | 2.8 | 2.1 |

|                        |                |                                                                                |      |      |      |
|------------------------|----------------|--------------------------------------------------------------------------------|------|------|------|
| Os.329.1.S1_at         | LOC_Os04g55670 | glycosyltransferase family 43 protein, putative, expressed                     | 2.1  | 1.5  | 2.5  |
| Os.35024.1.S1_at       | LOC_Os01g31370 | glycosyltransferase, putative, expressed                                       | 2.2  | 2.6  | 3    |
| Os.53077.1.S1_at       | LOC_Os04g42760 | sialyltransferase family domain containing protein, expressed                  | 2.5  | 1    | 1.6  |
| Os.49253.1.S1_at       | LOC_Os06g12390 | galactosyltransferase family protein, putative, expressed                      | 2.1  | 1.3  | 2    |
| Os.46627.1.S1_at       | LOC_Os10g40640 | glycosyl transferase 8 domain containing protein, putative, expressed          | 3.7  | 2.7  | 2.2  |
| Os.26079.1.S1_at       | LOC_Os02g50600 | glycosyl transferase 8 domain containing protein, putative, expressed          | 2.2  | 1.7  | 1.8  |
| Os.5910.1.S1_at        | LOC_Os04g54360 | glycosyl transferase 8 domain containing protein, putative, expressed          | 1.4  | 1    | 1.3  |
| OsAffx.27621.1.S1_s_at | LOC_Os06g13760 | glycosyl transferase 8 domain containing protein, putative, expressed          | 1.6  | 2.2  | 2    |
| Os.17173.1.S1_at       | LOC_Os05g08640 | transferase family protein, putative, expressed                                | 1    | 1.4  | 2.8  |
| Os.49692.1.S1_at       | LOC_Os06g39470 | transferase family protein, putative, expressed                                | 1    | 2.8  | 2.3  |
| Os.30000.1.S1_at       | LOC_Os07g36560 | transferase family protein, putative, expressed                                | 3.8  | 1.9  | 1.8  |
| Os.31415.1.S1_at       | LOC_Os10g13810 | glycosyltransferase family 43 protein, putative, expressed                     | 2.5  | 1.4  | 1.6  |
| Os.42801.1.S1_at       | LOC_Os07g42626 | STRUBBELIG-RECEPTOR FAMILY 6 precursor, putative, expressed                    | -1.2 | -2.2 | -2.6 |
| Os.4905.1.S1_a_at      | LOC_Os01g09010 | transferase family protein, putative, expressed                                | 1.4  | 1.5  | 1.7  |
| Os.53153.1.S1_at       | LOC_Os04g14190 | TRAF-type zinc finger family protein, expressed                                | 1.7  | 3.4  | 7.5  |
| OsAffx.3952.1.S1_s_at  | LOC_Os04g30420 | dehydrogenase, putative, expressed                                             | 1.3  | 1.2  | 1.4  |
| OsAffx.12986.1.S1_at   | LOC_Os03g22200 | nodulin MtN3 family protein, putative, expressed                               | -1.5 | -2.4 | -1.3 |
| Os.27846.1.S1_at       | LOC_Os03g52340 | endoplasmic oxidoreductin-1 precursor, putative, expressed                     | 2.3  | 2.4  | 1.6  |
| Os.15917.1.S1_at       | LOC_Os04g41960 | NADP-dependent oxidoreductase, putative, expressed                             | 2.3  | 1.4  | 1.4  |
| Os.34373.1.S1_at       | LOC_Os12g12580 | NADP-dependent oxidoreductase, putative, expressed                             | 1    | 1.2  | 2.1  |
| Os.50961.1.S1_at       | LOC_Os03g58890 | oxidoreductase, putative, expressed                                            | 3    | 4.1  | 2.1  |
| Os.51535.1.S1_at       | LOC_Os08g05280 | oxidoreductase family, NAD-binding Rossmann fold containing protein, expressed | 2.6  | 2    | 3.6  |

|                      |                |                                                                                         |      |      |      |
|----------------------|----------------|-----------------------------------------------------------------------------------------|------|------|------|
| Os.53830.1.S1_at     | LOC_Os02g40840 | alcohol oxidase, putative, expressed                                                    | 3.2  | 1.2  | 3.5  |
| Os.52001.1.S2_at     | LOC_Os05g01030 | phospholipid-transporting ATPase, putative, expressed                                   | 2.9  | 1.9  | 2    |
| Os.44475.1.S1_at     | LOC_Os07g37730 | NADH-ubiquinone oxidoreductase, mitochondrial precursor, putative, expressed            | 5.5  | 3.3  | 4.9  |
| Os.10399.1.S1_at     | LOC_Os05g02310 | soluble inorganic pyrophosphatase, putative, expressed                                  | 1.2  | 1.5  | 1.4  |
| Os.50985.1.S1_at     | LOC_Os05g36260 | soluble inorganic pyrophosphatase, putative, expressed                                  | 7.8  | 3    | 2.8  |
| Os.15199.1.S1_at     | LOC_Os08g14860 | cytochrome b-c1 complex subunit 7, putative, expressed                                  | -1.6 | -1.7 | -1.5 |
| Os.11552.1.S1_at     | LOC_Os04g59150 | peroxidase precursor, putative, expressed                                               | 4.1  | 3.6  | 1.5  |
| Os.11552.1.S2_at     | LOC_Os04g59150 | peroxidase precursor, putative, expressed                                               | 3.7  | 2.7  | 1.5  |
| Os.55595.1.S1_at     | LOC_Os11g02100 | peroxidase precursor, putative, expressed                                               | 3.7  | 2.4  | 1.2  |
| Os.53435.1.S1_at     | LOC_Os06g49890 | coiled-coil domain-containing protein 90A, mitochondrial precursor, putative, expressed | 1.4  | 1    | 1.7  |
| Os.11558.1.S1_at     | LOC_Os01g16450 | peroxidase precursor, putative, expressed                                               | 1    | 1    | 1.7  |
| Os.33106.1.S1_at     | LOC_Os01g57730 | peroxidase precursor, putative, expressed                                               | 3    | 5.4  | 5.2  |
| Os.49540.1.A1_x_at   | LOC_Os01g57730 | peroxidase precursor, putative, expressed                                               | 2.6  | 3.6  | 2.7  |
| Os.7832.1.S1_at      | LOC_Os03g02920 | peroxidase precursor, putative, expressed                                               | 1.2  | 1.3  | 1.9  |
| Os.10615.1.S1_s_at   | LOC_Os12g02310 | LTPL11 - Protease inhibitor/seed storage/LTP family protein precursor, expressed        | 2.5  | 2.5  | 2.2  |
| Os.37454.1.S1_at     | LOC_Os01g38580 | beta,beta-carotene 9,10-dioxygenase, putative, expressed                                | 1.6  | 2.3  | 2.2  |
| Os.53604.1.S1_at     | LOC_Os03g52860 | lipoxygenase, putative, expressed                                                       | 2.5  | 5    | 7.9  |
| Os.405.1.S1_a_at     | LOC_Os12g37260 | lipoxygenase 2.1, chloroplast precursor, putative, expressed                            | 1    | 1.7  | 2.9  |
| Os.14415.1.S1_a_at   | LOC_Os03g49380 | lipoxygenase, putative, expressed                                                       | 1.5  | 1.7  | 2.8  |
| OsAffx.26361.1.S1_at | LOC_Os04g37430 | lipoxygenase protein, putative, expressed                                               | 3.8  | 1.7  | 2.2  |

|                        |                |                                                                                         |     |     |     |
|------------------------|----------------|-----------------------------------------------------------------------------------------|-----|-----|-----|
| Os.27405.1.S1_at       | LOC_Os05g23880 | lipoxygenase, putative, expressed                                                       | 1.7 | 2.7 | 2.9 |
| Os.11639.1.S1_at       | LOC_Os06g05130 | myristoyl-acyl carrier protein thioesterase, chloroplast precursor, putative, expressed | 1.9 | 1.8 | 2.4 |
| OsAffx.27248.1.S1_x_at | LOC_Os05g40010 | LTPL17 - Protease inhibitor/seed storage/LTP family protein precursor, expressed        | 2   | 2.9 | 1.8 |
| Os.7985.1.S1_at        | LOC_Os03g18070 | omega-3 fatty acid desaturase, chloroplast precursor, putative, expressed               | 5.6 | 2.7 | 1.2 |
| Os.39806.1.S1_at       | LOC_Os03g32470 | leucoanthocyanidin dioxygenase, putative, expressed                                     | 3.7 | 7   | 4.2 |
| Os.5511.1.S1_s_at      | LOC_Os06g12250 | sphingolipid C4-hydroxylase SUR2, putative, expressed                                   | 1.4 | 2.7 | 2.5 |
| Os.11570.1.S1_s_at     | LOC_Os05g41590 | glycerol-3-phosphate dehydrogenase, putative, expressed                                 | 2.6 | 2.7 | 2.5 |
| Os.4807.1.S1_at        | LOC_Os04g54200 | diacylglycerol kinase, putative, expressed                                              | 2.1 | 2.4 | 2   |
| Os.51035.1.S1_at       | LOC_Os12g12260 | diacylglycerol kinase 1, putative, expressed                                            | 2.1 | 1.1 | 1.8 |
| Os.24612.1.A1_at       | LOC_Os05g04960 | phosphoglycerate mutase, putative, expressed                                            | 1.3 | 1.3 | 1.9 |
| Os.20910.1.S1_at       | LOC_Os02g32370 | inositol hexaphosphate kinase, putative, expressed                                      | 2.1 | 1.6 | 1.8 |
| Os.36122.2.S1_at       | LOC_Os01g41650 | pentatricopeptide, putative, expressed                                                  | 1.2 | 1.6 | 2.2 |
| Os.54269.1.S1_s_at     | LOC_Os05g48060 | phosphatidylserine synthase, putative, expressed                                        | 1   | 1.1 | 2.3 |
| Os.50455.1.S1_at       | LOC_Os06g40170 | phospholipase D, putative, expressed                                                    | 3.8 | 3   | 5.3 |
| Os.22413.1.S1_at       | LOC_Os03g59070 | phosphatase, putative, expressed                                                        | 1.1 | 1.4 | 1.2 |
| Os.14998.1.S1_at       | LOC_Os04g37670 | steroid nuclear receptor, ligand-binding, putative, expressed                           | 3.5 | 2.1 | 1.7 |
| Os.50575.2.S1_x_at     | LOC_Os04g40700 | steroid nuclear receptor, ligand-binding, putative, expressed                           | 1.6 | 1.1 | 2.1 |
| Os.17130.1.S1_at       | LOC_Os04g57540 | adenylate kinase, putative, expressed                                                   | 1.8 | 1.2 | 1.1 |
| Os.10884.1.S1_at       | LOC_Os03g58790 | ATPase, putative, expressed                                                             | 3.1 | 1   | 2.6 |
| Os.26730.1.S1_at       | LOC_Os07g48430 | nucleoside-triphosphatase, putative, expressed                                          | 1.7 | 1.1 | 1.3 |
| Os.50554.1.S1_at       | LOC_Os07g09630 | oxidoreductase, putative, expressed                                                     | 2.7 | 1.8 | 3.2 |

|                      |                |                                                                                                            |      |      |      |
|----------------------|----------------|------------------------------------------------------------------------------------------------------------|------|------|------|
| Os.10695.1.S1_at     | LOC_Os02g53790 | adenylate kinase, putative, expressed                                                                      | 1.8  | 1.5  | 1.2  |
| Os.10930.1.S1_at     | LOC_Os02g41670 | phenylalanine ammonia-lyase, putative, expressed                                                           | 4.5  | 3    | 3.1  |
| Os.5365.1.S1_at      | LOC_Os02g21040 | aspartic proteinase nepenthesin precursor, putative, expressed                                             | 3.4  | 1.7  | 1.9  |
| Os.26626.1.S1_at     | LOC_Os05g33400 | basic 7S globulin precursor, putative, expressed                                                           | 5    | 2.5  | 1.8  |
| Os.12286.1.S1_at     | LOC_Os03g52690 | CBS domain containing membrane protein, putative, expressed                                                | -2.8 | -4.2 | -2.7 |
| Os.47761.1.S1_at     | LOC_Os03g13300 | glutamate decarboxylase, putative, expressed                                                               | 2.6  | 5.6  | 4.4  |
| OsAffx.29513.1.S1_at | LOC_Os08g34700 | GDU1, putative, expressed                                                                                  | -3.2 | -2.8 | -2.3 |
| Os.5028.1.S1_at      | LOC_Os02g48870 | aspartic proteinase nepenthesin-2 precursor, putative, expressed                                           | 1.7  | 1.5  | 3.3  |
| Os.27824.1.S1_at     | LOC_Os09g28000 | OsSigP6 - Putative Type I Signal Peptidase homologue; employs a putative Ser/Lys catalytic dyad, expressed | 1.6  | 1.5  | 1.6  |
| Os.50466.1.S1_at     | LOC_Os02g41630 | phenylalanine ammonia-lyase, putative, expressed                                                           | -1   | -2.2 | -2.1 |
| Os.52536.1.S1_at     | LOC_Os04g43800 | phenylalanine ammonia-lyase, putative, expressed                                                           | 5    | 2.2  | 2.6  |
| Os.11417.1.S1_at     | LOC_Os02g26810 | cytochrome P450, putative, expressed                                                                       | 2.1  | 1    | 1.3  |
| Os.12145.1.S1_at     | LOC_Os02g47470 | cytochrome P450, putative, expressed                                                                       | 1.4  | 2.4  | 1.8  |
| Os.14105.1.S1_at     | LOC_Os11g05380 | cytochrome P450, putative, expressed                                                                       | 7.5  | 2.9  | 3.2  |
| Os.17265.1.S1_at     | LOC_Os01g29150 | cytochrome P450 72A1, putative, expressed                                                                  | -1.3 | -2.6 | -1.9 |
| Os.51923.1.S1_at     | LOC_Os12g05440 | cytochrome P450, putative, expressed                                                                       | 9.1  | 2.7  | 1.7  |
| Os.52963.1.S1_at     | LOC_Os04g08824 | cytochrome P450, putative, expressed                                                                       | -4.9 | -4.5 | -2.4 |
| Os.52963.2.S1_at     | LOC_Os04g08824 | cytochrome P450, putative, expressed                                                                       | -4.3 | -3   | -1.9 |
| Os.5542.1.S1_at      | LOC_Os02g43360 | cytochrome b5-like Heme/Steroid binding domain containing protein, expressed                               | 2.7  | 3.7  | 2.1  |
| Os.9067.1.S1_at      | LOC_Os07g44140 | cytochrome P450 72A1, putative, expressed                                                                  | 3.9  | 1.7  | 2.6  |
| Os.26843.1.S1_at     | LOC_Os12g38920 | heparanase-like protein precursor, putative, expressed                                                     | 1.2  | 1.3  | 1    |

|                      |                |                                                                                   |      |      |      |
|----------------------|----------------|-----------------------------------------------------------------------------------|------|------|------|
| Os.7335.1.S1_at      | LOC_Os02g36340 | riboflavin biosynthesis protein ribAB, chloroplast precursor, putative, expressed | 1.8  | 1.9  | 1.9  |
| Os.10348.1.S1_at     | LOC_Os01g41430 | UDP-glucuronosyl and UDP-glucosyl transferase, putative, expressed                | 3    | 3.4  | 1.8  |
| Os.11952.1.S1_at     | LOC_Os02g11070 | 3-ketoacyl-CoA synthase, putative, expressed                                      | 4.9  | 3    | 3.4  |
| Os.12948.1.S1_at     | LOC_Os02g08420 | cinnamoyl CoA reductase, putative, expressed                                      | 3.2  | 1.2  | 1.4  |
| Os.27794.1.S1_at     | LOC_Os04g27190 | terpene synthase, putative, expressed                                             | -3.2 | -2.2 | -3.7 |
| Os.53814.1.S1_at     | LOC_Os09g04050 | dehydrogenase, putative, expressed                                                | 1    | 2.2  | 1.7  |
| Os.53946.1.S1_at     | LOC_Os08g41440 | UDP-glucuronate 4-epimerase, putative, expressed                                  | 1.9  | 1.3  | 1.7  |
| Os.7510.1.S1_at      | LOC_Os10g41020 | flavonol synthase/flavanone 3-hydroxylase, putative, expressed                    | 1.9  | 1.3  | 1.7  |
| Os.9286.1.S1_at      | LOC_Os06g39750 | 3-ketoacyl-CoA synthase, putative, expressed                                      | 2.4  | 1.3  | 1.6  |
| OsAffx.13994.1.S1_at | LOC_Os04g27430 | terpene synthase, putative, expressed                                             | -3.5 | -4.4 | -8.3 |
| OsAffx.3920.1.S1_at  | LOC_Os04g27670 | terpene synthase family, metal binding domain containing protein, expressed       | 3.1  | 4    | 2.3  |
| Os.11262.2.S1_x_at   | LOC_Os04g32920 | potassium transporter, putative, expressed                                        | 2.3  | 3.3  | 2.8  |
| Os.50428.1.S1_at     | LOC_Os04g11820 | white-brown complex homolog protein, putative, expressed                          | 3.5  | 2.1  | 2.9  |
| Os.26802.1.S1_at     | LOC_Os12g08130 | amino acid transporter, putative, expressed                                       | 3.3  | 1.7  | 1.6  |
| Os.26802.2.S1_at     | LOC_Os12g08090 | amino acid transporter, putative, expressed                                       | 2.2  | 1.1  | 1.3  |
| Os.1193.1.S1_at      | LOC_Os04g43070 | ammonium transporter protein, putative, expressed                                 | 2.1  | 1.4  | 2.3  |
| Os.52796.2.S1_x_at   | LOC_Os03g62200 | ammonium transporter protein, putative, expressed                                 | 2    | 5.7  | 5.6  |
| Os.17247.1.S1_at     | LOC_Os02g55970 | ANTH, putative, expressed                                                         | 3.1  | 3.6  | 3.2  |
| OsAffx.14324.1.S1_at | LOC_Os04g48290 | MATE efflux family protein, putative, expressed                                   | 3.8  | 2.9  | 2.4  |
| Os.19186.1.S1_at     | LOC_Os02g57620 | Citrate transporter protein, putative, expressed                                  | -1.7 | -1.2 | -1   |
| Os.11333.1.S1_s_at   | LOC_Os02g37320 | heavy metal associated domain containing protein, expressed                       | 4.1  | 2.5  | 3.1  |

|                       |                |                                                                         |      |      |      |
|-----------------------|----------------|-------------------------------------------------------------------------|------|------|------|
| Os.12082.1.S1_at      | LOC_Os04g39010 | heavy metal associated domain containing protein, expressed             | 3.2  | 2.8  | 1.9  |
| Os.38169.1.S1_a_at    | LOC_Os11g43860 | sodium/calcium exchanger protein, putative, expressed                   | -1.3 | -1.1 | -1   |
| Os.20614.3.S1_x_at    | LOC_Os10g41838 | F-box protein interaction domain containing protein, expressed          | 4.7  | 3.7  | 7.2  |
| Os.29907.1.S1_at      | LOC_Os01g48800 | purine permease, putative, expressed                                    | -2.8 | -2.1 | -1.4 |
| Os.609.3.S1_a_at      | LOC_Os08g37670 | plastocyanin-like domain containing protein, putative, expressed        | 2.7  | 1.6  | 1.4  |
| Os.54485.1.S1_at      | LOC_Os05g50770 | C4-dicarboxylate transporter/malic acid transport protein, expressed    | 5    | 3    | 1.7  |
| Os.46832.1.S1_at      | LOC_Os10g28240 | calcium-transporting ATPase, plasma membrane-type, putative, expressed  | 3.4  | 3.7  | 3.6  |
| Os.7607.1.S1_at       | LOC_Os07g47480 | heavy metal-associated domain containing protein, expressed             | -2.1 | -1.6 | -1.6 |
| Os.20354.1.S1_at      | LOC_Os03g45370 | sodium/calcium exchanger protein, putative, expressed                   | 1.6  | 1.7  | 2.1  |
| Os.7115.1.S1_a_at     | LOC_Os04g57200 | heavy metal transport/detoxification protein, putative, expressed       | 2.6  | 1.7  | 1.3  |
| OsAffx.6057.1.S1_s_at | LOC_Os08g37370 | mitochondrial carrier protein, putative, expressed                      | 1.6  | 1    | 1.2  |
| Os.26932.1.S1_at      | LOC_Os07g37320 | transporter family protein, putative, expressed                         | 3.7  | 1.2  | 2.5  |
| Os.11800.1.S1_at      | LOC_Os01g50100 | ABC transporter, ATP-binding protein, putative, expressed               | 4.4  | 6.3  | 3.2  |
| Os.23745.1.S1_at      | LOC_Os04g13220 | ABC transporter family protein, putative, expressed                     | 1.6  | 1.2  | 1.5  |
| Os.15360.1.S1_at      | LOC_Os04g41320 | nucleotide-sugar transporter family protein, putative, expressed        | 2.3  | 1.9  | 2    |
| Os.52201.1.S1_at      | LOC_Os04g41320 | nucleotide-sugar transporter family protein, putative, expressed        | 1.9  | 1.6  | 1.8  |
| Os.55618.1.S1_at      | LOC_Os07g37454 | urate anion exchanger, putative, expressed                              | 5    | 5.8  | 5.6  |
| Os.467.1.S1_a_at      | LOC_Os01g42380 | pleiotropic drug resistance protein, putative, expressed                | 5.6  | 3.4  | 3.2  |
| Os.470.1.S1_s_at      | LOC_Os01g42410 | pleiotropic drug resistance protein, putative, expressed                | 2.7  | 1.4  | 2    |
| Os.17020.1.S1_x_at    | LOC_Os08g29570 | pleiotropic drug resistance protein 3, putative, expressed              | 3.9  | 2.7  | 2.4  |
| Os.11525.1.S1_s_at    | LOC_Os03g48180 | peptide transporter PTR2, putative, expressed                           | 1    | 1.3  | 1.7  |
| Os.18745.1.S1_at      | LOC_Os03g60880 | nucleobase-ascorbate transporter, putative, expressed                   | 3.7  | 5.2  | 2.3  |
| Os.23183.1.S1_at      | LOC_Os09g28160 | phosphate carrier protein, mitochondrial precursor, putative, expressed | 3    | 1.5  | 3.1  |



|                        |                |                                                                           |      |      |      |
|------------------------|----------------|---------------------------------------------------------------------------|------|------|------|
| OsAffx.31541.1.S1_s_at | LOC_Os11g01610 | prenylated rab acceptor, putative, expressed                              | 4.3  | 1.6  | 3.5  |
| Os.26062.1.S1_a_at     | LOC_Os02g58080 | transporter, major facilitator family, putative, expressed                | 1.5  | 1.1  | 1.3  |
| Os.316.1.S1_at         | LOC_Os07g01560 | transporter family protein, putative, expressed                           | 1.1  | 1.1  | 1    |
| Os.11851.1.S1_at       | LOC_Os03g11900 | transporter family protein, putative, expressed                           | 3    | 2.1  | 2.5  |
| Os.17652.1.S1_s_at     | LOC_Os03g43720 | transporter family protein, putative, expressed                           | -1   | -1.1 | -2.1 |
| Os.17652.1.S2_s_at     | LOC_Os03g43720 | transporter family protein, putative, expressed                           | -1   | -1.1 | -2.1 |
| Os.5210.1.S1_at        | LOC_Os08g39370 | citrate transporter, putative, expressed                                  | -1.8 | -2.6 | -1.6 |
| Os.14869.1.S1_at       | LOC_Os01g49120 | MATE efflux family protein, putative, expressed                           | 1.7  | 1.7  | 1.9  |
| Os.53242.1.S1_at       | LOC_Os02g52180 | plastocyanin-like domain containing protein, putative, expressed          | -1.4 | -2.1 | -1.4 |
| Os.27175.1.S1_a_at     | LOC_Os07g12890 | metal cation transporter, putative, expressed                             | 5.3  | 1.9  | 1.6  |
| Os.29959.1.S1_at       | LOC_Os07g01810 | potassium channel protein, putative, expressed                            | -2.8 | -1.9 | -2   |
| Os.4775.2.S1_at        | LOC_Os01g04370 | hsp20/alpha crystallin family protein, putative, expressed                | 1.4  | 1.2  | 1.6  |
| Os.54493.1.S1_at       | LOC_Os06g14490 | calmodulin-binding heat-shock protein, putative, expressed                | 1.7  | 1.8  | 2.2  |
| Os.12257.1.S1_at       | LOC_Os02g52150 | heat shock 22 kDa protein, mitochondrial precursor, putative, expressed   | 2.1  | 1.9  | 1.3  |
| Os.38581.1.S1_s_at     | LOC_Os05g38530 | DnaK family protein, putative, expressed                                  | 1.8  | 1.3  | 1.1  |
| Os.11029.1.S1_at       | LOC_Os03g16860 | DnaK family protein, putative, expressed                                  | 2.9  | 1.4  | 1.1  |
| Os.23778.1.S1_at       | LOC_Os02g32590 | HSF-type DNA-binding domain containing protein, expressed                 | 3.2  | 2.4  | 1.7  |
| Os.39876.1.S1_at       | LOC_Os04g48030 | heat stress transcription factor B-1, putative, expressed                 | 1.9  | 2.3  | 1.2  |
| Os.27176.1.S1_at       | LOC_Os09g28354 | CPuORF39 - conserved peptide uORF-containing transcript, expressed        | 1.1  | 1.5  | 2.5  |
| Os.11941.1.S1_at       | LOC_Os09g35790 | HSF-type DNA-binding domain containing protein, expressed                 | 1.2  | 2.3  | 1.5  |
| Os.11941.2.S1_at       | LOC_Os09g35790 | HSF-type DNA-binding domain containing protein, expressed                 | 1.2  | 2.9  | 2.9  |
| Os.14195.1.S1_at       | LOC_Os03g19200 | DNAJ heat shock N-terminal domain-containing protein, putative, expressed | 4    | 2.2  | 1.9  |

|                     |                |                                                                                   |      |      |      |
|---------------------|----------------|-----------------------------------------------------------------------------------|------|------|------|
| Os.10942.1.S1_a_at  | LOC_Os10g28340 | heat stress transcription factor, putative, expressed                             | 1.1  | 2    | 2.3  |
| Os.40018.1.S1_at    | LOC_Os05g45410 | HSF-type DNA-binding domain containing protein, expressed                         | 3.8  | 2.3  | 3    |
| Os.50642.1.S1_at    | LOC_Os04g48030 | heat stress transcription factor B-1, putative, expressed                         | 1.5  | 2.2  | 2.5  |
| Os.52661.1.S1_at    | LOC_Os11g44680 | calmodulin binding protein, putative, expressed                                   | 4.9  | 3    | 2.4  |
| Os.9073.1.S1_at     | LOC_Os01g57470 | EF hand family protein, putative, expressed                                       | 4.2  | 7.1  | 4.4  |
| Os.14996.2.S1_a_at  | LOC_Os04g42430 | EF hand family protein, putative, expressed                                       | 1.6  | 1    | 1    |
| Os.11931.1.S1_s_at  | LOC_Os06g47130 | C2 domain containing protein, expressed                                           | 1.3  | 1.2  | 1.1  |
| Os.20355.1.S1_at    | LOC_Os01g72100 | OsCML10 - Calmodulin-related calcium sensor protein, expressed                    | 1.7  | 1.7  | 1.1  |
| Os.16401.1.S1_at    | LOC_Os03g21380 | OsCML27 - Calmodulin-related calcium sensor protein, expressed                    | 1.8  | 1.4  | 1.6  |
| Os.15688.1.S1_at    | LOC_Os12g36110 | calmodulin binding protein, putative, expressed                                   | 2.7  | 2.2  | 2.2  |
| Os.15688.2.S1_x_at  | LOC_Os12g36110 | calmodulin binding protein, putative, expressed                                   | 2.8  | 2.5  | 2.3  |
| Os.17887.1.S1_at    | LOC_Os12g36910 | calmodulin binding protein, putative, expressed                                   | 2.8  | 1.7  | 1.8  |
| Os.5356.1.S1_at     | LOC_Os01g38980 | calmodulin-binding protein, putative, expressed                                   | 3.8  | 2.8  | 2    |
| Os.6364.1.S1_at     | LOC_Os10g27170 | calmodulin-binding protein, putative, expressed                                   | -1.4 | -1.9 | -1.5 |
| OsAffx.5948.1.S1_at | LOC_Os08g27170 | calmodulin binding protein, putative, expressed                                   | 6.4  | 2.5  | 3.5  |
| Os.31290.1.S1_at    | LOC_Os07g42740 | DUF1645 domain containing protein, putative, expressed                            | 2.6  | 1.5  | 2.2  |
| Os.8889.1.S1_at     | LOC_Os05g50180 | OsCML14 - Calmodulin-related calcium sensor protein, expressed                    | 1.7  | 3    | 1.4  |
| Os.17445.1.S1_s_at  | LOC_Os03g27080 | calmodulin-binding transcription activator 2, putative, expressed                 | 1.4  | 1.7  | 2.1  |
| Os.12000.1.S1_at    | LOC_Os01g72080 | calmodulin-like protein 1, putative, expressed                                    | 1.1  | 1.1  | 1.1  |
| Os.18922.2.S1_at    | LOC_Os01g72530 | OsCML31 - Calmodulin-related calcium sensor protein, expressed                    | 1.2  | 1.9  | 1.2  |
| Os.5101.1.S1_at     | LOC_Os05g13580 | OsCML18 - Calmodulin-related calcium sensor protein, expressed                    | 2.4  | 2.6  | 2    |
| Os.20863.1.S1_at    | LOC_Os01g62980 | LTPL101 - Protease inhibitor/seed storage/LTP family protein precursor, expressed | -1.3 | -3.2 | -1.8 |

|                      |                |                                                                                                     |      |      |      |
|----------------------|----------------|-----------------------------------------------------------------------------------------------------|------|------|------|
| OsAffx.27357.1.S1_at | LOC_Os05g47770 | serine/threonine-protein kinase At1g18390 precursor, putative, expressed                            | 5.5  | 3.4  | 1.6  |
| Os.13497.1.S2_at     | LOC_Os03g13820 | protein kinase family protein, putative, expressed                                                  | 1.6  | 1.3  | 1.3  |
| Os.14381.2.S1_x_at   | LOC_Os03g28300 | protein kinase domain containing protein, expressed                                                 | -2.4 | -2.8 | -1.9 |
| Os.24364.1.A1_s_at   | LOC_Os02g51860 | dehydration response related protein, putative, expressed                                           | 2.3  | 1.8  | 1.1  |
| Os.2528.1.S1_x_at    | LOC_Os10g37500 | AAA-type ATPase family protein, putative, expressed                                                 | 2.2  | 1.3  | 1.8  |
| Os.9205.1.S1_x_at    | LOC_Os03g62340 | protein kinase family protein, putative, expressed                                                  | 1.4  | 1    | 2.1  |
| OsAffx.27980.1.S1_at | LOC_Os06g37620 | protein kinase family protein, putative, expressed                                                  | 2.5  | 1.9  | 2    |
| Os.17533.1.S1_at     | LOC_Os11g08950 | protein kinase family protein, putative, expressed                                                  | -1.6 | -1.6 | -2.4 |
| Os.648.1.S1_at       | LOC_Os01g43480 | AAA-type ATPase family protein, putative, expressed                                                 | 1.9  | 1.2  | 1.6  |
| Os.14381.1.S1_at     | LOC_Os03g28300 | protein kinase domain containing protein, expressed                                                 | -2.4 | -4   | -2.7 |
| Os.54207.1.S1_at     | LOC_Os03g03280 | TKL_IRAK_CrRLK1L-1.6 - The CrRLK1L-1 subfamily has homology to the CrRLK1L homolog, expressed       | 2.4  | 1.3  | 1.2  |
| Os.27195.1.S1_at     | LOC_Os07g34640 | pyruvate Pi dikinase regulatory protein, putative, expressed                                        | 2.4  | 3    | 2.2  |
| Os.282.1.S1_a_at     | LOC_Os04g49510 | CAMK_CAMK_like.27 - CAMK includes calcium/calmodulin dependent protein kinases, expressed           | 1    | 1.4  | 2    |
| Os.282.2.S1_a_at     | LOC_Os04g49510 | CAMK_CAMK_like.27 - CAMK includes calcium/calmodulin dependent protein kinases, expressed           | 1.1  | 1.2  | 1.4  |
| Os.53349.1.S1_at     | LOC_Os03g57450 | CAMK_CAMK_like.2 - CAMK includes calcium/calmodulin dependent protein kinases, expressed            | 1.5  | 1.9  | 1.7  |
| Os.2355.1.S1_at      | LOC_Os02g03410 | CAMK_CAMK_like.12 - CAMK includes calcium/calmodulin dependent protein kinases, expressed           | 1.7  | 1.5  | 2.5  |
| OsAffx.12721.1.S1_at | LOC_Os03g03510 | CAMK_KIN1/SNF1/Nim1_like.15 - CAMK includes calcium/calmodulin dependent protein kinases, expressed | 1    | 1.3  | 1    |
| Os.5431.1.S1_at      | LOC_Os04g49690 | FERONIA receptor-like kinase, putative, expressed                                                   | 5    | 1.7  | 1.3  |

|                       |                |                                                                                               |      |      |      |
|-----------------------|----------------|-----------------------------------------------------------------------------------------------|------|------|------|
| Os.54803.1.S1_at      | LOC_Os08g03070 | lectin-like receptor kinase 1, putative, expressed                                            | 2.4  | 2.6  | 3.6  |
| Os.46490.1.S1_at      | LOC_Os10g30540 | lectin-like receptor kinase, putative, expressed                                              | 2.2  | 1.6  | 1.3  |
| Os.18085.1.S1_at      | LOC_Os04g44900 | lectin-like receptor kinase, putative, expressed                                              | 2.2  | 1.4  | 1.7  |
| Os.24927.1.S1_at      | LOC_Os03g56160 | lectin-like receptor kinase 7, putative, expressed                                            | 1.5  | 2.6  | 2.7  |
| Os.48817.1.A1_at      | LOC_Os04g45730 | protein kinase domain containing protein, expressed                                           | 3.7  | 2.2  | 3.7  |
| Os.42801.1.S1_at      | LOC_Os07g42626 | STRUBBELIG-RECEPTOR FAMILY 6 precursor, putative, expressed                                   | -1.2 | -2.2 | -2.6 |
| Os.11617.1.S1_at      | LOC_Os05g49140 | CGMC_MAPKCMGC_2.8 - CGMC includes CDA, MAPK, GSK3, and CLKC kinases, expressed                | 1.5  | 1.6  | 1.9  |
| Os.406.1.S1_a_at      | LOC_Os03g17700 | CGMC_MAPKCGMC_2_ERK.2 - CGMC includes CDA, MAPK, GSK3, and CLKC kinases, expressed            | 3    | 3    | 2.8  |
| Os.27382.2.S1_at      | LOC_Os02g02120 | OsWAK11 - OsWAK receptor-like protein kinase, expressed                                       | 2.8  | 2.2  | 3.3  |
| Os.49913.1.S1_at      | LOC_Os02g56380 | OsWAK21 - OsWAK receptor-like cytoplasmic kinase OsWAK-RLCK, expressed                        | 6.9  | 4.9  | 2.1  |
| Os.49528.2.S1_at      | LOC_Os04g44910 | receptor like protein kinase, putative, expressed                                             | 1.5  | 1    | 1.9  |
| Os.18692.1.S1_at      | LOC_Os02g43290 | protein kinase domain containing protein, expressed                                           | 2.6  | 1.7  | 1.4  |
| Os.49849.1.S1_at      | LOC_Os09g27010 | tyrosine protein kinase domain containing protein, putative, expressed                        | 1.3  | 3.4  | 2.4  |
| Os.54867.1.S1_at      | LOC_Os09g27010 | tyrosine protein kinase domain containing protein, putative, expressed                        | 2.5  | 2.2  | 2.3  |
| Os.11183.1.S1_s_at    | LOC_Os06g18000 | protein kinase domain containing protein, expressed                                           | 3.6  | 1.2  | 1.5  |
| Os.27110.1.A1_at      | LOC_Os11g44560 | protein kinase domain containing protein, expressed                                           | 4.1  | 1.5  | 2.4  |
| Os.32801.1.S1_x_at    | LOC_Os06g18000 | protein kinase domain containing protein, expressed                                           | 3.5  | 1.4  | 1.1  |
| OsAffx.3879.1.S1_x_at | LOC_Os04g24300 | OsWAK35a - OsWAK short gene, expressed                                                        | 3.3  | 4.9  | 1.3  |
| Os.33613.1.S1_at      | LOC_Os01g06280 | TKL_IRAK_CrRLK1L-1.4 - The CrRLK1L-1 subfamily has homology to the CrRLK1L homolog, expressed | 3.7  | 2.8  | 2.7  |
| Os.27517.1.A1_s_at    | LOC_Os11g14140 | OsFBK25 - F-box domain and kelch repeat containing protein, expressed                         | -2   | -2   | -1   |

|                    |                |                                                                                               |      |     |      |
|--------------------|----------------|-----------------------------------------------------------------------------------------------|------|-----|------|
| Os.16895.1.A1_at   | LOC_Os03g17300 | TKL_IRAK_CrRLK1L-1.7 - The CrRLK1L-1 subfamily has homology to the CrRLK1L homolog, expressed | 1.6  | 1.1 | 1.2  |
| Os.21870.1.S1_at   | LOC_Os02g45750 | protein kinase domain containing protein, expressed                                           | 1.9  | 1.7 | 2.2  |
| Os.32267.1.S1_at   | LOC_Os01g56330 | TKL_IRAK_CrRLK1L-1.5 - The CrRLK1L-1 subfamily has homology to the CrRLK1L homolog, expressed | 1.8  | 1   | 1.8  |
| Os.41776.1.S1_at   | LOC_Os01g47730 | ras-related protein, putative, expressed                                                      | 2.1  | 1.1 | 1.3  |
| Os.27046.1.S1_at   | LOC_Os01g02300 | receptor kinase ORK10, putative, expressed                                                    | 3.3  | 1.7 | 1.3  |
| Os.27046.2.S1_x_at | LOC_Os01g02300 | receptor kinase ORK10, putative, expressed                                                    | 4.2  | 2.2 | 1.3  |
| Os.47360.1.S1_x_at | LOC_Os01g49920 | protein kinase, putative, expressed                                                           | 1.7  | 1.7 | 2.8  |
| Os.26411.1.A1_at   | LOC_Os08g28710 | receptor protein kinase CRINKLY4 precursor, putative, expressed                               | 7.4  | 4.8 | 1.5  |
| Os.50750.1.S1_at   | LOC_Os03g02190 | protein kinase domain containing protein, expressed                                           | -2.8 | -1  | -1.8 |
| Os.51954.1.S1_at   | LOC_Os01g54700 | retrotransposon protein, putative, unclassified, expressed                                    | 3.6  | 1.8 | 2    |
| Os.10619.1.S2_at   | LOC_Os05g44770 | receptor-like protein kinase 5 precursor, putative, expressed                                 | 4.3  | 3.1 | 3.8  |
| Os.11775.1.S2_at   | LOC_Os01g53920 | receptor-like protein kinase 5 precursor, putative, expressed                                 | 5.1  | 2.7 | 2.4  |
| Os.46800.1.S1_a_at | LOC_Os10g33040 | receptor-like protein kinase precursor, putative, expressed                                   | 2.9  | 2.5 | 3.2  |
| Os.46800.1.S2_a_at | LOC_Os10g33040 | receptor-like protein kinase precursor, putative, expressed                                   | 3.2  | 2.3 | 2.8  |
| Os.31858.3.S1_x_at | LOC_Os07g35340 | TKL_IRAK_DUF26-lc.14 - DUF26 kinases have homology to DUF26 containing loci, expressed        | 4.3  | 3.1 | 1.6  |
| Os.2436.1.S1_at    | LOC_Os11g10290 | S-domain receptor-like protein kinase, putative, expressed                                    | 5.2  | 2.6 | 3    |
| Os.1978.1.S1_at    | LOC_Os01g02290 | Ser/Thr receptor-like kinase, putative, expressed                                             | 4.6  | 2.7 | 1.3  |
| Os.48695.1.S1_x_at | LOC_Os07g35390 | TKL_IRAK_DUF26-lc.17 - DUF26 kinases have homology to DUF26 containing loci, expressed        | 3.1  | 2.1 | 1.1  |
| Os.47874.1.S1_at   | LOC_Os04g51950 | serine/threonine-protein kinase HT1, putative, expressed                                      | 1.8  | 1.2 | 1.7  |
| Os.39168.1.S1_at   | LOC_Os02g02600 | serine/threonine-protein kinase Cx32, chloroplast precursor, putative,                        | 1.9  | 1.3 | 1.3  |

| expressed          |                |                                                                                                                       |      |      |      |
|--------------------|----------------|-----------------------------------------------------------------------------------------------------------------------|------|------|------|
| Os.17034.1.S1_at   | LOC_Os09g36320 | tyrosine protein kinase domain containing protein, putative, expressed                                                | 2.3  | 2.1  | 2.6  |
| Os.49354.1.S1_at   | LOC_Os07g48730 | tyrosine protein kinase domain containing protein, putative, expressed                                                | 2.9  | 3.7  | 2.9  |
| Os.27484.1.S1_at   | LOC_Os02g06930 | protein kinase, putative, expressed                                                                                   | 4.2  | 3.3  | 2.5  |
| Os.4555.1.S1_at    | LOC_Os04g52840 | tyrosine protein kinase domain containing protein, putative, expressed                                                | 2.1  | 1.6  | 1.9  |
| Os.45938.1.S1_at   | LOC_Os03g15770 | tyrosine protein kinase domain containing protein, putative, expressed                                                | 2.1  | 1.8  | 1.5  |
| Os.16320.1.S1_at   | LOC_Os07g39520 | STE_PAK_Ste20_Slob_Wnk.5 - STE kinases include homologs to sterile 7, sterile 11 and sterile 20 from yeast, expressed | 1.6  | 1.1  | 1.4  |
| Os.57529.1.S1_at   | LOC_Os04g53994 | kinase, putative, expressed                                                                                           | 2.4  | 2.8  | 3.3  |
| Os.21066.1.S1_at   | LOC_Os03g56250 | LRR receptor-like protein kinase, putative, expressed                                                                 | 2.4  | 1    | 1.8  |
| Os.10384.1.S1_at   | LOC_Os03g10950 | protein phosphatase 2C, putative, expressed                                                                           | 4.2  | 1.2  | 1.2  |
| Os.19321.1.S1_at   | LOC_Os03g60650 | protein phosphatase 2C, putative, expressed                                                                           | 3    | 2.4  | 2.5  |
| Os.49657.1.S1_at   | LOC_Os09g28560 | protein phosphatase protein, putative, expressed                                                                      | 2.1  | 4.2  | 2.6  |
| Os.22480.1.S1_at   | LOC_Os02g35910 | protein phosphatase protein, putative, expressed                                                                      | 1.8  | 1.5  | 2    |
| Os.38297.1.S1_a_at | LOC_Os03g55320 | protein phosphatase 2C, putative, expressed                                                                           | 1.9  | 2    | 1.8  |
| Os.47314.1.S1_at   | LOC_Os08g39100 | protein phosphatase 2C, putative, expressed                                                                           | -1.2 | -1.1 | -1.1 |
| Os.45919.1.S1_at   | LOC_Os07g45100 | endonuclease/exonuclease/phosphatase family domain containing protein, expressed                                      | 1.6  | 1.4  | 2.9  |
| Os.27538.1.S1_at   | LOC_Os12g17430 | NBS-LRR disease resistance protein, putative, expressed                                                               | 3.3  | 2.6  | 1.2  |
| Os.49413.1.A1_x_at | LOC_Os09g34150 | NBS-LRR disease resistance protein, putative, expressed                                                               | 4.4  | 2.3  | 3.1  |
| Os.51991.1.S1_at   | LOC_Os02g38392 | NBS-LRR disease resistance protein, putative, expressed                                                               | 3.5  | 2.2  | 3.4  |
| Os.49400.1.S2_s_at | LOC_Os11g11960 | disease resistance protein RPM1, putative, expressed                                                                  | 4.4  | 2    | 4.4  |
| Os.54085.1.S1_at   | LOC_Os11g12050 | NBS-LRR type disease resistance protein, putative, expressed                                                          | 2.9  | 2.4  | 2.9  |

|                        |                |                                                                            |      |      |      |
|------------------------|----------------|----------------------------------------------------------------------------|------|------|------|
| OsAffx.30939.2.S1_s_at | LOC_Os11g11960 | disease resistance protein RPM1, putative, expressed                       | 4.8  | 3.2  | 1.7  |
| Os.34741.1.S1_at       | LOC_Os01g19130 | protein phosphatase 2C, putative, expressed                                | 1.5  | 1.3  | 1.4  |
| OsAffx.12910.1.S1_at   | LOC_Os03g18150 | protein phosphatase 2C, putative, expressed                                | 1.8  | 1.4  | 1.3  |
| Os.27860.1.A1_at       | LOC_Os01g53710 | dual specificity protein phosphatase, putative, expressed                  | 1.4  | 1.4  | 1.2  |
| Os.10606.1.S1_a_at     | LOC_Os01g48190 | drought induced 19 protein, putative, expressed                            | 1.7  | 1.5  | 1.5  |
| Os.12153.1.S1_at       | LOC_Os01g57470 | EF hand family protein, putative, expressed                                | 1.6  | 1.3  | 1    |
| Os.42069.1.S1_x_at     | LOC_Os01g55510 | dynein light chain type 1 domain containing protein, expressed             | 2.2  | 5.7  | 4.1  |
| Os.7916.1.S1_at        | LOC_Os01g59150 | tubulin/FtsZ domain containing protein, putative, expressed                | -2   | -1.3 | -2.2 |
| Os.46904.1.S1_x_at     | LOC_Os01g59150 | tubulin/FtsZ domain containing protein, putative, expressed                | -1.2 | -1.1 | -1.8 |
| Os.49141.1.S1_at       | LOC_Os04g59560 | tubulin folding cofactor B, putative, expressed                            | -1   | -1.3 | -1.3 |
| Os.49634.1.S1_x_at     | LOC_Os01g55510 | dynein light chain type 1 domain containing protein, expressed             | 2.3  | 4    | 4.1  |
| Os.5163.1.S1_at        | LOC_Os02g50570 | retrotransposon protein, putative, unclassified, expressed                 | 3    | 2.8  | 2.8  |
| Os.57196.1.S1_at       | LOC_Os04g38880 | dynein light chain type 1 domain containing protein, expressed             | 2.1  | 1    | 1.7  |
| Os.6965.1.S1_at        | LOC_Os03g19720 | EF hand family protein, putative, expressed                                | 2.2  | 1.5  | 1.5  |
| Os.10054.1.S1_at       | LOC_Os02g46650 | ubiquitin carboxyl-terminal hydrolase domain containing protein, expressed | 2.3  | 2.4  | 3    |
| Os.4657.1.S1_at        | LOC_Os02g50940 | NHL repeat-containing protein, putative, expressed                         | 1.6  | 1    | 1.6  |
| Os.8901.1.S2_at        | LOC_Os02g22130 | expressed protein                                                          | 1.8  | 1.1  | 1    |
| Os.1438.1.S1_at        | LOC_Os01g06590 | zinc finger, C3HC4 type domain containing protein, expressed               | 1.7  | 1.5  | 1.7  |
| Os.6205.2.S1_at        | LOC_Os04g44820 | zinc finger, C3HC4 type domain containing protein, expressed               | -1   | -1.1 | -1.7 |
| Os.9558.1.S1_s_at      | LOC_Os02g45780 | zinc finger, C3HC4 type domain containing protein, expressed               | 2.5  | 1.5  | 1.1  |
| Os.3710.1.S1_at        | LOC_Os02g35329 | RING-H2 finger protein ATL3F, putative, expressed                          | 2.6  | 2.5  | 2.3  |
| Os.55469.1.S1_s_at     | LOC_Os08g06090 | zinc finger, C3HC4 type domain containing protein, expressed               | -1.8 | -1.7 | -1.3 |
| Os.11365.1.S1_at       | LOC_Os02g52210 | zinc finger, C3HC4 type domain containing protein, expressed               | 3    | 4    | 2.3  |

|                      |                |                                                                   |      |      |      |
|----------------------|----------------|-------------------------------------------------------------------|------|------|------|
| Os.9138.1.S1_at      | LOC_Os09g36500 | zinc finger, C3HC4 type domain containing protein, expressed      | 2.8  | 4.5  | 1.9  |
| Os.37798.1.S1_at     | LOC_Os01g11460 | zinc finger, C3HC4 type domain containing protein, expressed      | 1.6  | 1.9  | 1.2  |
| Os.45749.1.A1_at     | LOC_Os01g20910 | zinc finger, C3HC4 type domain containing protein, expressed      | 2    | 1.3  | 1.2  |
| Os.55651.1.S1_at     | LOC_Os06g11450 | zinc finger, C3HC4 type domain containing protein, expressed      | 2.8  | 2.1  | 2.4  |
| Os.20060.1.S1_at     | LOC_Os03g05570 | RING-H2 finger protein ATL3F, putative, expressed                 | 2.2  | 1.3  | 1.9  |
| Os.7731.1.S1_at      | LOC_Os01g11520 | RING-H2 finger protein, putative, expressed                       | 2.7  | 1.2  | 1.5  |
| OsAffx.24820.1.S1_at | LOC_Os02g50930 | RING-H2 finger protein, putative, expressed                       | 1.3  | 1.8  | 1.3  |
| Os.57174.1.S1_at     | LOC_Os07g38940 | ubiquitin-conjugating enzyme, putative, expressed                 | -1.1 | -1   | -1   |
| Os.1660.1.S1_at      | LOC_Os01g02200 | armadillo/beta-catenin repeat family protein, putative, expressed | -1.7 | -1.2 | -1.9 |
| Os.8271.1.S1_at      | LOC_Os01g67500 | armadillo/beta-catenin repeat family protein, putative, expressed | -1.7 | -1.6 | -2   |
| Os.6261.1.S1_at      | LOC_Os05g01940 | zinc finger, RING-type, putative, expressed                       | 2    | 1.7  | 1.8  |
| Os.11935.1.S1_at     | LOC_Os02g32520 | ERD1 protein, chloroplast precursor, putative, expressed          | 1.2  | 1.5  | 1.5  |
| Os.11900.1.S1_at     | LOC_Os02g37930 | hypoxia-responsive family protein, putative, expressed            | 2    | 1.7  | 1.6  |
| Os.23468.1.A1_at     | LOC_Os09g27950 | galactosyltransferase, putative, expressed                        | 1.9  | 3.3  | 2.1  |
| Os.9677.2.S1_x_at    | LOC_Os01g62670 | avr9/Cf-9 rapidly elicited protein, putative, expressed           | 2.8  | 2.7  | 2.5  |
| Os.33238.2.S1_at     | LOC_Os02g20970 | C2 domain containing protein, putative, expressed                 | 3.2  | 1.6  | 1.4  |
| Os.51866.1.S1_at     | LOC_Os11g10770 | disease resistance protein RGA3, putative, expressed              | 1.1  | 1.4  | 1.5  |
| Os.49895.1.S1_x_at   | LOC_Os11g41170 | disease resistance protein RPM1, putative, expressed              | 1.4  | 1.4  | 1.1  |
| OsAffx.25172.1.S1_at | LOC_Os03g20840 | disease resistance RPP13-like protein 1, putative, expressed      | 2.6  | 2    | 2.3  |
| Os.14830.1.S1_a_at   | LOC_Os01g63190 | laccase precursor protein, putative, expressed                    | -2.1 | -1   | -1.6 |
| Os.34130.1.S1_at     | LOC_Os01g66510 | MLO domain containing protein, putative, expressed                | 3.1  | 1.3  | 2.5  |
| Os.6321.1.S1_at      | LOC_Os01g63690 | hsl, putative, expressed                                          | 4.7  | 2.2  | 1.8  |
| Os.12163.1.S1_at     | LOC_Os03g12510 | non-symbiotic hemoglobin 2, putative, expressed                   | 2.6  | 2.5  | 2.1  |



|                        |                |                                                                                   |      |      |      |
|------------------------|----------------|-----------------------------------------------------------------------------------|------|------|------|
| Os.49329.1.S1_at       | LOC_Os02g35490 | MLO domain containing protein, putative, expressed                                | 4.4  | 3    | 2.4  |
| Os.4327.1.S1_at        | LOC_Os03g03700 | MLO domain containing protein, putative, expressed                                | 3.7  | 1.7  | 1.1  |
| OsAffx.25525.1.S1_at   | LOC_Os03g43880 | PLA IIIA/PLP7, putative, expressed                                                | 2.6  | 1.7  | 3.7  |
| Os.5031.1.S1_at        | LOC_Os12g36830 | pathogenesis-related Bet v I family protein, putative, expressed                  | 6.7  | 9.9  | 3.5  |
| Os.165.1.S1_at         | LOC_Os12g36880 | pathogenesis-related Bet v I family protein, putative, expressed                  | 4.9  | 5.9  | 3.1  |
| Os.46589.1.S1_at       | LOC_Os10g17790 | remorin C-terminal domain containing protein, putative, expressed                 | 1.8  | 2.1  | 1.7  |
| Os.21394.1.S1_at       | LOC_Os02g24080 | SNARE domain containing protein, putative, expressed                              | 2.6  | 1.3  | 1.4  |
| Os.6671.1.S1_a_at      | LOC_Os05g39930 | spotted leaf 11, putative, expressed                                              | 2.1  | 1.7  | 1.5  |
| Os.6671.2.S1_x_at      | LOC_Os05g39930 | spotted leaf 11, putative, expressed                                              | 1.7  | 1.3  | 1.3  |
| Os.8789.1.S1_at        | LOC_Os08g44850 | C2 domain containing protein, putative, expressed                                 | 1    | 1.5  | 1.2  |
| Os.26945.1.S1_at       | LOC_Os12g17090 | stripe rust resistance protein Yr10, putative, expressed                          | 1.6  | 1    | 1    |
| Os.52260.1.S1_at       | LOC_Os03g57310 | syntaxin, putative, expressed                                                     | 2.7  | 1.8  | 1.6  |
| Os.46793.1.S1_at       | LOC_Os10g05660 | thaumatin, putative, expressed                                                    | 4.5  | 2.4  | 2.2  |
| Os.5299.2.S1_a_at      | LOC_Os05g37970 | universal stress protein domain containing protein, putative, expressed           | 2.1  | 2.1  | 1.8  |
| Os.8355.1.S1_a_at      | LOC_Os01g61690 | OsSCP5 - Putative Serine Carboxypeptidase homologue, expressed                    | 2.4  | 6.1  | 3.5  |
| Os.7664.1.S1_at        | LOC_Os02g56900 | thioredoxin family protein, putative, expressed                                   | 1.6  | 1.7  | 1.5  |
| Os.4698.1.S1_at        | LOC_Os01g70770 | glutathione S-transferase, putative, expressed                                    | 2.5  | 2.3  | 1.7  |
| Os.17522.1.S1_s_at     | LOC_Os10g37290 | DEFL6 - Defensin and Defensin-like DEFL family, expressed                         | -2.7 | -3.8 | -1.3 |
| Os.53936.1.S1_at       | LOC_Os03g15270 | gibberellin receptor GID1L2, putative, expressed                                  | 2.9  | 1.6  | 1.8  |
| Os.12119.1.S1_at       | LOC_Os01g64470 | harpin-induced protein 1 domain containing protein, expressed                     | 4.2  | 3.7  | 2.3  |
| Os.51479.1.S1_at       | LOC_Os09g25720 | glycine-rich cell wall structural protein 2 precursor, putative, expressed        | 3.4  | 3.5  | 2.1  |
| OsAffx.18589.1.S1_s_at | LOC_Os10g40480 | LTPL143 - Protease inhibitor/seed storage/LTP family protein precursor, expressed | 3.7  | 2.8  | 1.5  |

|                      |                |                                                                                   |      |      |      |
|----------------------|----------------|-----------------------------------------------------------------------------------|------|------|------|
| OsAffx.13359.1.S1_at | LOC_Os03g45250 | 2-aminoethanethiol dioxygenase, putative, expressed                               | 3.9  | 4.6  | 6.6  |
| Os.22076.1.S1_a_at   | LOC_Os01g62430 | C2 domain containing protein, putative, expressed                                 | 7.8  | 3.3  | 1.5  |
| Os.9065.1.S1_at      | LOC_Os04g35130 | expressed protein                                                                 | 2.6  | 1.6  | 1.3  |
| Os.50598.1.S1_at     | LOC_Os12g03370 | harpin-induced protein 1 domain containing protein, expressed                     | 2.4  | 1.5  | 3.9  |
| Os.55637.1.S1_at     | LOC_Os05g45070 | harpin-induced protein 1 domain containing protein, expressed                     | 5.8  | 4.2  | 5.6  |
| Os.6244.1.S1_at      | LOC_Os03g13740 | immediate-early fungal elicitor protein CMPG1, putative, expressed                | 6.6  | 3.2  | 2.6  |
| Os.12746.1.S1_at     | LOC_Os01g54510 | MAC/Perforin domain containing protein, putative, expressed                       | 1.7  | 1    | 1.2  |
| Os.49198.1.S1_at     | LOC_Os04g58090 | harpin-induced protein 1 domain containing protein, expressed                     | 3.7  | 2.8  | 2.1  |
| Os.35510.1.S1_at     | LOC_Os02g01220 | rhodanese-like domain containing protein, putative, expressed                     | -3   | -1.3 | -1   |
| Os.12240.1.S1_at     | LOC_Os02g52010 | phosphate-induced protein 1 conserved region domain containing protein, expressed | 2.3  | 3.4  | 2.8  |
| Os.32498.1.S1_at     | LOC_Os08g06170 | berberine and berberine like domain containing protein, expressed                 | 5.5  | 5.3  | 1.1  |
| Os.7228.1.S1_at      | LOC_Os02g51970 | phosphate-induced protein 1 conserved region domain containing protein, expressed | 3    | 3.8  | 3.5  |
| Os.9194.1.S1_at      | LOC_Os02g52040 | phosphate-induced protein 1 conserved region domain containing protein, expressed | 2.6  | 4    | 2.4  |
| Os.50379.1.S1_at     | LOC_Os11g04830 | embryogenesis transmembrane protein, putative, expressed                          | 3.8  | 2.6  | 2.6  |
| Os.53236.1.S1_at     | LOC_Os02g43170 | B-box zinc finger family protein, putative, expressed                             | 2.5  | 2.5  | 2    |
| Os.8545.1.S1_at      | LOC_Os01g19940 | expressed protein                                                                 | 2.3  | 2.6  | 2.6  |
| Os.7151.1.S1_at      | LOC_Os04g18090 | histone H1, putative, expressed                                                   | -1.3 | -1.9 | -1.1 |
| OsAffx.28093.1.S1_at | LOC_Os06g44040 | DOMON domain containing protein, expressed                                        | 1.7  | 1.7  | 1.8  |
| Os.11725.1.S1_at     | LOC_Os09g13940 | AP2 domain containing protein, expressed                                          | -2   | -1.1 | -1.3 |
| OsAffx.2967.1.S1_at  | LOC_Os02g45420 | AP2 domain containing protein, expressed                                          | 2.7  | 3    | 2.1  |

|                           |                |                                                                                |      |      |      |
|---------------------------|----------------|--------------------------------------------------------------------------------|------|------|------|
| <u>Os.30670.2.S1_x_at</u> | LOC_Os07g22730 | AP2 domain containing protein, expressed                                       | 1.8  | 1.3  | 1.1  |
| Os.4804.1.S1_at           | LOC_Os06g07030 | AP2 domain containing protein, expressed                                       | -2.5 | -1.7 | -1.8 |
| Os.4463.1.S1_s_at         | LOC_Os06g03670 | dehydration-responsive element-binding protein, putative, expressed            | 2.4  | 3.8  | 1.6  |
| Os.51078.1.S1_at          | LOC_Os02g45450 | dehydration-responsive element-binding protein, putative, expressed            | 3    | 3.2  | 1.6  |
| Os.5816.1.S1_at           | LOC_Os09g35010 | dehydration-responsive element-binding protein, putative, expressed            | 2.2  | 2.3  | 1.1  |
| Os.55643.1.S1_at          | LOC_Os04g46440 | AP2 domain containing protein, expressed                                       | 1.3  | 3.1  | 1.6  |
| Os.57527.1.S1_at          | LOC_Os04g48350 | dehydration-responsive element-binding protein, putative, expressed            | 1.1  | 3.2  | 2.1  |
| Os.6328.1.S1_at           | LOC_Os04g41570 | ethylene-responsive protein related, putative, expressed                       | 2.1  | 1.9  | 1.6  |
| Os.8920.1.S1_at           | LOC_Os07g47790 | AP2 domain containing protein, expressed                                       | 3.4  | 2.9  | 1.6  |
| Os.4893.1.S1_at           | LOC_Os05g29810 | AP2 domain containing protein, expressed                                       | 3.2  | 2.8  | 2.4  |
| Os.53660.1.S1_at          | LOC_Os02g43790 | ethylene-responsive transcription factor, putative, expressed                  | 1.3  | 1.1  | 1.5  |
| Os.57381.1.S1_at          | LOC_Os03g22170 | AP2 domain containing protein, expressed                                       | 1.6  | 2.9  | 1.7  |
| Os.8031.1.S1_at           | LOC_Os01g21120 | AP2 domain containing protein, expressed                                       | 2.3  | 3.9  | 2.4  |
| Os.5338.1.S1_at           | LOC_Os10g30150 | universal stress protein domain containing protein, putative, expressed        | 1.9  | 5.7  | 1.2  |
| OsAffx.27278.1.S1_at      | LOC_Os05g41760 | AP2 domain containing protein, expressed                                       | 1.2  | 1.5  | 1.4  |
| Os.30670.1.S1_at          | LOC_Os07g22730 | AP2 domain containing protein, expressed                                       | 2.6  | 1.6  | 1.6  |
| Os.55386.1.A1_at          | LOC_Os10g41330 | AP2 domain containing protein, expressed                                       | 3    | 6.3  | 5.7  |
| Os.14125.1.S1_at          | LOC_Os09g35030 | dehydration-responsive element-binding protein, putative, expressed            | 2.1  | 2.8  | 1.5  |
| Os.51427.1.S1_at          | LOC_Os04g55980 | glycine-rich RNA-binding, abscisic acid-inducible protein, putative, expressed | 5.8  | 4.3  | 6.3  |
| Os.39652.1.S1_at          | LOC_Os09g37330 | OsSAUR39 - Auxin-responsive SAUR gene family member, expressed                 | -3.4 | -1.5 | -2.3 |
| Os.26512.1.S1_at          | LOC_Os03g58350 | OsIAA14 - Auxin-responsive Aux/IAA gene family member, expressed               | -2.1 | -4.7 | -3.4 |
| Os.8622.1.S1_at           | LOC_Os07g08460 | OsIAA24 - Auxin-responsive Aux/IAA gene family member, expressed               | -3.1 | -3.8 | -1.8 |

|                        |                |                                                                                       |      |      |      |
|------------------------|----------------|---------------------------------------------------------------------------------------|------|------|------|
| Os.11798.1.S1_at       | LOC_Os07g40290 | OsGH3.8 - Probable indole-3-acetic acid-amido synthetase, expressed                   | 3.8  | 2.4  | 2    |
| OsAffx.23807.1.S1_x_at | LOC_Os01g56240 | OsSAUR2 - Auxin-responsive SAUR gene family member, expressed                         | 5.5  | 4    | 2.9  |
| Os.11194.1.S1_at       | LOC_Os08g35190 | auxin-repressed protein, putative, expressed                                          | -1.5 | -1.1 | -1.7 |
| Os.26629.1.S1_a_at     | LOC_Os11g14190 | ARGOS, putative, expressed                                                            | -1.5 | -1.1 | -2.2 |
| Os.14965.1.S1_at       | LOC_Os04g02754 | amidase family protein, putative, expressed                                           | 2    | 1.1  | 1.3  |
| Os.6876.1.S1_at        | LOC_Os04g38950 | class I glutamine amidotransferase, putative, expressed                               | 2.7  | 1.6  | 1.6  |
| Os.14079.1.S1_at       | LOC_Os03g58320 | indole-3-glycerol phosphate lyase, chloroplast precursor, putative, expressed         | 2    | 2    | 2.2  |
| Os.52733.1.S1_at       | LOC_Os04g03980 | Osyucca7,flavin monooxygenase, putative, expressed                                    | -2.7 | -5.9 | -1.8 |
| Os.6101.1.S1_at        | LOC_Os04g12970 | UDP-glucuronosyl/UDP-glucosyl transferase, putative, expressed                        | 3.7  | 3.8  | 5.1  |
| Os.7203.1.S1_at        | LOC_Os01g63230 | growth regulator related protein, putative, expressed                                 | 1.5  | 2.2  | 2.2  |
| OsAffx.15372.1.S1_x_at | LOC_Os06g11600 | growth regulator related protein, putative, expressed                                 | 1.5  | 1.6  | 1.4  |
| Os.12637.1.S1_at       | LOC_Os04g46180 | AGC_PVPK_like_kin82y.11 - ACG kinases include homologs to PKA, PKG and PKC, expressed | -1.4 | -2   | -1.5 |
| Os.23942.1.A1_at       | LOC_Os02g35180 | OsRR2 type-A response regulator, expressed                                            | -1.1 | -1.2 | -1.9 |
| Os.8117.1.S1_at        | LOC_Os04g36070 | OsRR1 type-A response regulator, expressed                                            | -1.7 | -1.1 | -2.4 |
| Os.37430.1.S1_at       | LOC_Os11g04720 | OsRR10 type-A response regulator, expressed                                           | -1.1 | -1   | -1.4 |
| Os.53614.1.S1_at       | LOC_Os02g51930 | cytokinin-O-glucosyltransferase 2, putative, expressed                                | 1.2  | 2.7  | 1    |
| Os.51664.1.S1_at       | LOC_Os06g11720 | cytokinin-O-glucosyltransferase 2, putative, expressed                                | 5    | 2.3  | 3.2  |
| Os.11046.1.S1_at       | LOC_Os06g39240 | endothelial differentiation-related factor 1, putative, expressed                     | 1.9  | 3.9  | 1.9  |
| Os.11230.1.S1_s_at     | LOC_Os05g03040 | AP2 domain containing protein, expressed                                              | -1.5 | -1.4 | -1.5 |
| Os.12183.1.S1_at       | LOC_Os04g33030 | protein binding protein, putative, expressed                                          | -1   | -2.6 | -2.1 |
| Os.17487.1.S1_at       | LOC_Os03g50310 | CCT/B-box zinc finger protein, putative, expressed                                    | -1.2 | -1.3 | -1.3 |

|                    |                 |                                                                            |      |      |      |
|--------------------|-----------------|----------------------------------------------------------------------------|------|------|------|
| Os.18714.1.S1_a_at | LOC_Os10g14920  | integral membrane protein DUF6 containing protein, expressed               | -3.3 | -2   | -2.7 |
| Os.22478.2.S1_at   | LOC_Os01g60650  | non-green plastid inner envelope membrane protein, putative, expressed     | 1.3  | 1.2  | 1.6  |
| Os.22577.1.S1_x_at | LOC_Os01g32770  | DUF260 domain containing protein, putative, expressed                      | 1.5  | 1.8  | 1.6  |
| Os.3340.1.S1_a_at  | LOC_Os06g24070  | myb-like DNA-binding domain containing protein, expressed                  | -2.2 | -1   | -1   |
| Os.38638.4.S1_s_at | LOC_Os06g05020  | early nodulin 93 ENOD93 protein, putative, expressed                       | 2.3  | 3.4  | 1.8  |
| Os.38856.1.A1_s_at | LOC_Os01g67950  | ubiquitin family protein, putative, expressed                              | 2.6  | 3.7  | 2.7  |
| Os.4404.1.S1_at    | LOC_Os06g01966  | auxin-induced protein 5NG4, putative, expressed                            | -1.7 | -1.4 | -1.7 |
| Os.8859.1.S1_s_at  | LOC_Os07g07990  | uncharacterized protein At4g06744 precursor, putative, expressed           | 2.4  | 1.1  | 1    |
| Os.1054.1.A1_at    | LOC_Os01g02900  | glycosyltransferase, putative, expressed                                   | 1.2  | 2.7  | 2.3  |
| Os.11749.1.S1_at   | LOC_Os03g08860  | GRAM domain containing protein, expressed                                  | 1.5  | 1.1  | 1.2  |
| Os.11983.1.S1_at   | LOC_Os03g04110  | lysM domain-containing GPI-anchored protein precursor, putative, expressed | 1    | 1.8  | 1.9  |
| Os.140.3.S1_x_at   | LOC_Os04g58810  | CAF1 family ribonuclease containing protein, putative, expressed           | 2.8  | 1.6  | 1.6  |
| Os.19370.1.S1_at   | LOC_Os08g39060  | F-box protein At-B, putative, expressed                                    | -1.1 | -1   | -1.3 |
| Os.2019.1.S1_at    | LOC_Os01g50460  | nodulin MtN3 family protein, putative, expressed                           | -4.6 | -1.1 | -1.3 |
| Os.20335.1.S1_at   | LOC_Os01g50440  | AWPM-19-like membrane family protein, putative, expressed                  | 1.6  | 1.1  | 1    |
| Os.22590.1.A1_at   | LOC_Os03g17850  | glycosyltransferase family 43 protein, putative, expressed                 | 2    | 2.9  | 3    |
| Os.26978.1.S1_a_at | LOC_Os11g40610  | EARLY flowering protein, putative, expressed                               | -1.6 | -1.8 | -1.6 |
| Os.27197.2.A1_at   | LOC_Os04g37790, | expressed protein                                                          | 3.9  | 2.5  | 2.9  |
| Os.27232.1.S1_at   | LOC_Os01g68650  | plant-specific domain TIGR01615 family protein, expressed                  | -1.3 | -1.1 | -2.2 |
| Os.27247.1.S1_at   | LOC_Os06g50950  | GDSL-like lipase/acylhydrolase, putative, expressed                        | 2.6  | 1.1  | 3    |
| Os.27254.1.S1_s_at | LOC_Os03g06680  | plant-specific domain TIGR01615 family protein, expressed                  | -1.3 | -1   | -1.2 |
| Os.27945.1.A1_at   | LOC_Os04g59020  | integral membrane protein, putative, expressed                             | -1.9 | -2   | -1   |

|                    |                |                                                                                                                                       |      |      |      |
|--------------------|----------------|---------------------------------------------------------------------------------------------------------------------------------------|------|------|------|
| Os.2915.1.S1_at    | LOC_Os01g21250 | late embryogenesis abundant protein, putative, expressed                                                                              | 3.2  | 4.1  | 2.3  |
| Os.37067.1.S1_at   | LOC_Os10g37760 | OsRhmbd17 - Putative Rhomboid homologue, expressed                                                                                    | 1.5  | 2.8  | 1.6  |
| Os.38235.2.S1_x_at | LOC_Os04g52260 | LTPL124 - Protease inhibitor/seed storage/LTP family protein precursor, expressed                                                     | 3.2  | 4    | 3.7  |
| Os.46418.1.S1_at   | LOC_Os10g39100 | uncharacterized Cys-rich domain containing protein, putative, expressed                                                               | 3.1  | 3    | 1.3  |
| Os.48102.1.A1_s_at | LOC_Os03g02530 | OsRhmbd7 - Putative Rhomboid homologue, expressed                                                                                     | 2.6  | 1.6  | 1.2  |
| Os.487.1.S1_at     | LOC_Os01g15340 | flowering promoting factor-like 1, putative, expressed                                                                                | 4.5  | 2.3  | 2.4  |
| Os.5093.1.S1_at    | LOC_Os08g38210 | transcription factor BIM2, putative, expressed                                                                                        | 2.1  | 1.1  | 1.1  |
| Os.51763.1.S1_x_at | LOC_Os01g12690 | plant-specific domain TIGR01568 family protein, expressed                                                                             | 6.3  | 1.5  | 2.3  |
| Os.52263.1.S1_at   | LOC_Os02g50730 | metalloendoproteinase 1 precursor, putative, expressed                                                                                | 2.1  | 1.8  | 2.1  |
| Os.53322.1.S1_at   | LOC_Os09g31120 | pirin, putative, expressed                                                                                                            | 2.1  | 1.7  | 1.9  |
| Os.53396.1.S1_at   | LOC_Os07g08390 | plant-specific domain TIGR01615 family protein, expressed                                                                             | -2.8 | -1.7 | -2   |
| Os.54128.1.S1_at   | LOC_Os09g05030 | armadillo/beta-catenin-like repeat family protein, expressed                                                                          | 1.7  | 1.5  | 1.8  |
| Os.55671.1.S1_at   | LOC_Os06g44250 | haemolysin-III, putative, expressed                                                                                                   | 4.5  | 3    | 3.4  |
| Os.55674.1.S1_at   | LOC_Os05g46830 | proline-rich protein, putative, expressed                                                                                             | 4.7  | 3.3  | 3.9  |
| Os.55779.1.S1_at   | LOC_Os09g37967 | cupin domain containing protein, expressed                                                                                            | 4.3  | 7.2  | 5.8  |
| Os.55779.1.S1_at   | LOC_Os09g37967 | cupin domain containing protein, expressed                                                                                            | 4.3  | 7.2  | 5.8  |
| Os.56080.1.S1_at   | LOC_Os03g47280 | VQ domain containing protein, putative, expressed                                                                                     | 4.1  | 2.5  | 2.2  |
| Os.57548.1.S1_at   | LOC_Os12g05590 | RCN3 Centroradialis-like1 homologous to TFL1 gene; contains Pfam profile PF01161: Phosphatidylethanolamine-binding protein, expressed | -3   | -2.4 | -3.9 |
| Os.6288.1.S1_at    | LOC_Os08g31850 | expressed protein                                                                                                                     | 1.1  | 1.3  | 2.9  |
| Os.7235.1.S1_at    | LOC_Os03g21030 | no apical meristem protein, putative, expressed                                                                                       | 2.5  | 1.4  | 1.6  |
| Os.9206.1.S1_at    | LOC_Os10g35630 | cystathionin beta synthase protein, putative, expressed                                                                               | 2    | 1.9  | 1.9  |

|                        |                |                                                                                           |      |      |      |
|------------------------|----------------|-------------------------------------------------------------------------------------------|------|------|------|
| OsAffx.22593.2.S1_s_at | LOC_Os06g03860 | uncharacterized membrane protein, putative, expressed                                     | -1.2 | -1.2 | -1.5 |
| OsAffx.5584.1.S1_at    | LOC_Os07g40320 | vesicle transport protein GOT1B, putative, expressed                                      | 1.8  | 2.5  | 2.7  |
| Os.17322.1.S1_at       | LOC_Os06g16300 | BRASSINOSTEROID INSENSITIVE 1-associated receptor kinase 1 precursor, putative, expressed | 1.3  | 1.4  | 1    |
| Os.17766.1.S1_at       | LOC_Os06g12120 | BRASSINOSTEROID INSENSITIVE 1-associated receptor kinase 1 precursor, putative, expressed | 2.7  | 1.2  | 1.1  |
| Os.27488.1.S1_at       | LOC_Os07g40630 | BRASSINOSTEROID INSENSITIVE 1 precursor, putative, expressed                              | 3.1  | 2.1  | 4.9  |
| Os.8266.1.A1_at        | LOC_Os03g55800 | cytochrome P450, putative, expressed                                                      | 3.4  | 1.2  | 1.6  |
| Os.46956.1.S1_at       | LOC_Os01g50940 | helix-loop-helix DNA-binding domain containing protein, expressed                         | 3.9  | 1.3  | 1.5  |
| Os.11812.1.S1_at       | LOC_Os02g48770 | SAM dependent carboxyl methyltransferase, putative, expressed                             | 2.3  | 2.6  | 3.1  |
| Os.16540.1.S1_at       | LOC_Os07g06830 | gibberellin receptor GID1L2, putative, expressed                                          | 3.3  | 1.3  | 1.9  |
| Os.54936.1.S1_at       | LOC_Os03g57640 | gibberellin receptor GID1L2, putative, expressed                                          | 1.6  | 1.9  | 2.8  |
| Os.18395.1.S1_s_at     | LOC_Os06g15620 | GASR7 - Gibberellin-regulated GASA/GAST/Snakin family protein precursor, expressed        | 1.4  | 2.3  | 4.3  |
| Os.11766.1.S1_at       | LOC_Os07g36170 | chitin-inducible gibberellin-responsive protein, putative, expressed                      | 1.9  | 1.5  | 1.9  |
| Os.27419.1.S1_at       | LOC_Os11g47870 | GRAS family transcription factor domain containing protein, expressed                     | 1.6  | 1.9  | 1.7  |
| Os.10061.1.S1_at       | LOC_Os07g39470 | gibberellin response modulator protein, putative, expressed                               | 1.9  | 1.3  | 1.7  |
| Os.11773.1.S1_at       | LOC_Os05g27730 | WRKY53, expressed                                                                         | 2.4  | 1.4  | 2.2  |
| Os.11945.1.S1_at       | LOC_Os08g29660 | WRKY69,expressed                                                                          | 2.6  | 2.3  | 1.1  |
| Os.12032.1.S1_at       | LOC_Os02g08440 | WRKY71,expressed                                                                          | 2.6  | 1.8  | 1.6  |
| Os.27227.1.S1_at       | LOC_Os09g16510 | WRKY74,expressed                                                                          | 3.3  | 2.4  | 2.8  |
| Os.29979.1.S1_at       | LOC_Os01g09100 | WRKY10,expressed                                                                          | 1.3  | 2.9  | 1.4  |
| Os.31521.1.S1_at       | LOC_Os01g61080 | WRKY24,expressed                                                                          | 5.1  | 3.6  | 2.1  |

|                        |                |                                                               |      |      |      |
|------------------------|----------------|---------------------------------------------------------------|------|------|------|
| Os.33131.1.A1_at       | LOC_Os03g20550 | WRKY55,expressed                                              | 1.4  | 2.1  | 1.3  |
| Os.50015.1.S1_at       | LOC_Os06g44010 | WRK28,expressed                                               | 6.2  | 4.3  | 2.7  |
| Os.54467.1.S1_at       | LOC_Os03g21710 | WRKY79,expressed                                              | 3.7  | 3.4  | 2.9  |
| Os.55597.1.S1_at       | LOC_Os05g49620 | WRKY19,expressed                                              | 3.8  | 2    | 1.9  |
| Os.55827.1.S1_at       | LOC_Os11g29870 | WRKY72,expressed                                              | 2.2  | 1    | 1    |
| Os.56922.1.S1_at       | LOC_Os02g26430 | WRKY42,expressed                                              | 4.3  | 2    | 1.1  |
| Os.8961.1.S1_s_at      | LOC_Os05g46020 | WRKY7,expressed                                               | 2.5  | 2.2  | 2.1  |
| OsAffx.11050.2.S1_x_at | LOC_Os01g14440 | WRKY1,expressed                                               | 3.8  | 3.1  | 2.3  |
| OsAffx.21439.1.S1_at   | LOC_Os01g46800 | WRKY15,expressed                                              | 8.2  | 1.7  | 1.6  |
| OsAffx.9584.1.S1_at    | LOC_Os01g60600 | WRKY108,expressed                                             | 2.5  | 1.3  | 3.4  |
| Os.10172.1.S1_at       | LOC_Os02g41510 | MYB family transcription factor                               | 5.2  | 5.7  | 3    |
| Os.10174.1.S1_at       | LOC_Os11g47460 | MYB family transcription factor                               | -1.5 | -2.4 | -1.3 |
| Os.12994.1.S1_at       | LOC_Os12g38400 | MYB family transcription factor                               | 1.6  | 2.1  | 1.3  |
| Os.14823.1.S1_s_at     | LOC_Os03g20090 | MYB family transcription factor                               | 4    | 2.7  | 1.5  |
| Os.15338.1.S1_a_at     | LOC_Os01g34060 | MYB family transcription factor                               | -1.9 | -1.7 | -1.3 |
| Os.3388.2.S1_a_at      | LOC_Os04g43680 | MYB family transcription factor                               | 3.3  | 2.3  | 2.1  |
| Os.47854.1.S1_at       | LOC_Os02g46780 | MYB family transcription factor                               | -3.1 | -2.3 | -1   |
| Os.49619.1.S1_at       | LOC_Os03g20090 | MYB family transcription factor                               | 4.6  | 2.4  | 1    |
| Os.49787.1.S1_at       | LOC_Os01g64360 | MYB family transcription factor                               | 1.5  | 2    | 1.6  |
| Os.49848.1.S1_at       | LOC_Os04g50770 | MYB family transcription factor                               | -2.2 | -2.2 | -2.8 |
| Os.52913.1.A1_at       | LOC_Os08g43450 | MYB-like protein 1                                            | -3.9 | -2.7 | -3.5 |
| Os.5335.1.S1_at        | LOC_Os04g49440 | RNA recognition motif containing protein, putative, expressed | -2.3 | -1.6 | -3.1 |
| Os.55096.1.S1_at       | LOC_Os06g14670 | ODORANT1, putative, expressed                                 | 3.3  | 3.6  | 3.5  |



|                      |                |                                                                       |      |      |      |
|----------------------|----------------|-----------------------------------------------------------------------|------|------|------|
| Os.9336.1.S1_at      | LOC_Os08g43550 | MYB family transcription factor, putative, expressed                  | -2.8 | -2.8 | -2.7 |
| Os.8088.1.S1_at      | LOC_Os03g08310 | ZIM domain containing protein, putative, expressed                    | 5.8  | 4    | 2.3  |
| Os.9923.1.S1_at      | LOC_Os03g08330 | ZIM domain containing protein, putative, expressed                    | 5    | 2.5  | 1.5  |
| Os.46849.1.S1_at     | LOC_Os10g25230 | ZIM domain containing protein, putative, expressed                    | 4.5  | 1.7  | 1.5  |
| Os.12012.1.S1_at     | LOC_Os10g25290 | ZIM domain containing protein, putative, expressed                    | 4.1  | 2.6  | 1.5  |
| Os.48064.1.S1_at     | LOC_Os09g26780 | ZIM domain containing protein, putative, expressed                    | 2.4  | 3.5  | 3.6  |
| Os.12710.1.S1_at     | LOC_Os07g42370 | ZIM domain containing protein, putative, expressed                    | 1    | 1.2  | 1.1  |
| Os.10356.1.S1_at     | LOC_Os03g08320 | ZIM domain containing protein, putative, expressed                    | 4.9  | 3.3  | 2    |
| Os.10790.1.A1_at     | LOC_Os04g39080 | OsFBX140 - F-box domain containing protein, expressed                 | 2.6  | 1    | 1.3  |
| Os.10885.1.S1_at     | LOC_Os09g20650 | OsFBX323 - F-box domain containing protein, expressed                 | -1.8 | -1.8 | -2.1 |
| Os.11474.1.S1_at     | LOC_Os02g51350 | OsFBK10 - F-box domain and kelch repeat containing protein, expressed | 2.2  | 2.3  | 1.7  |
| Os.12329.1.S1_at     | LOC_Os01g65920 | F-box/LRR-repeat protein 2, putative, expressed                       | -1   | -1.1 | -1.1 |
| Os.15812.1.S1_at     | LOC_Os03g07530 | OsFBK12 - F-box domain and kelch repeat containing protein, expressed | 1.6  | 1.1  | 1.3  |
| Os.33110.1.S1_at     | LOC_Os01g45900 | OsFBX20 - F-box domain containing protein, expressed                  | -3.1 | -2.3 | -2.8 |
| Os.35797.1.S1_at     | LOC_Os07g13890 | OsFBX230 - F-box domain containing protein, expressed                 | -1.1 | -1.3 | -1.4 |
| Os.4782.1.S1_at      | LOC_Os03g58764 | OsFBDUF18 - F-box and DUF domain containing protein, expressed        | 2.3  | 1.9  | 1.5  |
| Os.51510.1.S1_at     | LOC_Os04g18790 | OsFBX126 - F-box domain containing protein, expressed                 | -1.5 | -1.5 | -3.1 |
| Os.52803.1.S1_at     | LOC_Os06g44500 | OsFBK17 - F-box domain and kelch repeat containing protein, expressed | -1.6 | -2   | -1.1 |
| Os.56260.1.S1_x_at   | LOC_Os08g09710 | OsFBX271 - F-box domain containing protein, expressed                 | -1   | -1   | -1.5 |
| Os.6314.1.S1_at      | LOC_Os04g33820 | OsFBX132 - F-box domain containing protein, expressed                 | 2    | 3.5  | 1    |
| Os.8724.1.S1_at      | LOC_Os07g37400 | OsFBX257 - F-box domain containing protein, expressed                 | 3.5  | 3.5  | 3    |
| Os.9695.2.S1_at      | LOC_Os01g08830 | OsFBDUF1 - F-box and DUF domain containing protein, expressed         | 1.1  | 2.1  | 2    |
| OsAffx.12526.1.S1_at | LOC_Os02g46690 | OsFBD8 - F-box and FBD domain containing protein, expressed           | 2.2  | 3.4  | 2.1  |

|                        |                |                                                                                                                                   |      |      |      |
|------------------------|----------------|-----------------------------------------------------------------------------------------------------------------------------------|------|------|------|
| Os.53268.1.S1_at       | LOC_Os09g17152 | OsFBX319 - F-box domain containing protein, expressed                                                                             | 4.1  | 2.5  | 1.9  |
| Os.15874.1.A1_at       | LOC_Os03g60570 | ZOS3-22 - C2H2 zinc finger protein, expressed                                                                                     | 2    | 2.3  | 1.1  |
| Os.16248.2.S1_x_at     | LOC_Os02g56250 | GATA zinc finger domain containing protein, expressed                                                                             | 2.3  | 2.3  | 1.5  |
| Os.16784.1.S1_at       | LOC_Os11g03420 | ZF-HD protein dimerisation region containing protein, expressed                                                                   | -1.1 | -1.5 | -1   |
| Os.20221.1.S1_at       | LOC_Os09g21710 | ANI-like zinc finger domain containing protein, expressed                                                                         | 1.2  | 1.3  | 1.4  |
| Os.25849.1.S1_x_at     | LOC_Os01g66970 | zinc finger, C3HC4 type domain containing protein, expressed                                                                      | -1.6 | -1.1 | -1.9 |
| Os.34720.1.S1_at       | LOC_Os01g70870 | ZOS1-23 - C2H2 zinc finger protein, expressed                                                                                     | -1.8 | -3.3 | -2.1 |
| Os.35718.1.S1_at       | LOC_Os12g39220 | ZOS12-08 - C2H2 zinc finger protein, expressed                                                                                    | -1.3 | -1.7 | -2.5 |
| Os.3710.1.S1_at        | LOC_Os02g35329 | RING-H2 finger protein ATL3F, putative, expressed                                                                                 | 2.6  | 2.5  | 2.3  |
| Os.38848.1.S1_at       | LOC_Os06g15330 | CCT/B-box zinc finger protein, putative, expressed                                                                                | -2.3 | -1.7 | -1.4 |
| Os.49588.1.S1_at       | LOC_Os03g41390 | ZOS3-15 - C2H2 zinc finger protein, expressed                                                                                     | 2.2  | 2.2  | 1.8  |
| Os.52208.1.S1_at       | LOC_Os11g45990 | von Willebrand factor type A domain containing protein, putative, expressed                                                       | 3.3  | 1.6  | 2.2  |
| Os.7834.1.S1_at        | LOC_Os05g06340 | GATA zinc finger domain containing protein, expressed                                                                             | -2.3 | -1.2 | -1.7 |
| OsAffx.24157.1.S1_s_at | LOC_Os02g07930 | B-box zinc finger family protein, putative, expressed                                                                             | 1.3  | 1.9  | 2    |
| Os.5736.1.S1_s_at      | LOC_Os10g26620 | dof zinc finger domain containing protein, putative, expressed                                                                    | -1.4 | -1.7 | -1.3 |
| Os.4186.1.S1_a_at      | LOC_Os01g55340 | dof zinc finger domain containing protein, putative, expressed                                                                    | 1.8  | 1.8  | 1    |
| Os.12498.2.S1_at       | LOC_Os01g72370 | helix-loop-helix DNA-binding domain containing protein, expressed                                                                 | 7.5  | 3.1  | 1    |
| Os.17133.1.S1_at       | LOC_Os03g43990 | BTBN8 - Bric-a-Brac, Tramtrack, Broad Complex BTB domain with non-phototropic hypocotyl 3 NPH3 and coiled-coil domains, expressed | 1.2  | 1.5  | 3.9  |
| Os.27140.1.S1_a_at     | LOC_Os03g61910 | retrotransposon protein, putative, unclassified, expressed                                                                        | -3.1 | -3   | -1.9 |
| Os.3406.1.S1_at        | LOC_Os04g51160 | transposon protein, putative, unclassified, expressed                                                                             | 4.5  | 5.3  | 4.6  |
| Os.46872.1.S1_at       | LOC_Os10g37160 | transposon protein, putative, unclassified, expressed                                                                             | 10.7 | 7.8  | 5.9  |

|                        |                |                                                                   |      |      |      |
|------------------------|----------------|-------------------------------------------------------------------|------|------|------|
| Os.51357.1.S1_at       | LOC_Os10g29650 | retrotransposon protein, putative, unclassified, expressed        | -1.2 | -1.6 | -3.9 |
| Os.52321.1.S1_at       | LOC_Os06g16050 | transposon protein, putative, CACTA, En/Spm sub-class, expressed  | 6.3  | 4.5  | 3.9  |
| Os.5562.1.S1_at        | LOC_Os04g51150 | transposon protein, putative, unclassified, expressed             | 3    | 2.5  | 1.4  |
| Os.7270.1.S1_x_at      | LOC_Os06g16050 | transposon protein, putative, CACTA, En/Spm sub-class, expressed  | 5.7  | 5    | 5.5  |
| OsAffx.2070.2.S1_at    | LOC_Os01g23850 | transposon protein, putative, CACTA, En/Spm sub-class, expressed  | 1.1  | 1    | 1.5  |
| Os.26695.1.S1_at       | LOC_Os03g60080 | NAC domain-containing protein 67, putative, expressed             | 1.1  | 1.2  | 1    |
| Os.5549.1.S1_at        | LOC_Os07g12340 | NAC domain-containing protein 67, putative, expressed             | 1.8  | 1.5  | 1.7  |
| OsAffx.19055.1.S1_at   | LOC_Os11g28470 | expressed protein                                                 | 3    | 3.2  | 2    |
| OsAffx.26443.1.S1_s_at | LOC_Os04g43440 | NB-ARC/LRR disease resistance protein, putative, expressed        | 4.2  | 6.8  | 3.8  |
| Os.10316.1.S1_at       | LOC_Os01g39330 | helix-loop-helix DNA-binding domain containing protein, expressed | 2.2  | 2.1  | 2.5  |
| Os.23257.1.A1_at       | LOC_Os06g06900 | helix-loop-helix DNA-binding domain containing protein, expressed | 2.3  | 2.7  | 1.9  |
| Os.46600.1.S1_at       | LOC_Os10g23050 | helix-loop-helix DNA-binding protein, putative, expressed         | -1.2 | -1.2 | -3.7 |
| Os.7116.1.S1_at        | LOC_Os03g53020 | helix-loop-helix DNA-binding domain containing protein, expressed | 4.3  | 2.9  | 2.2  |
| OsAffx.27480.1.S1_at   | LOC_Os06g06900 | helix-loop-helix DNA-binding domain containing protein, expressed | 1.6  | 1.7  | 1.9  |
| Os.34549.1.S1_at       | LOC_Os07g43530 | helix-loop-helix DNA-binding domain containing protein, expressed | 1.8  | 1.6  | 1.2  |
| Os.35707.1.S1_at       | LOC_Os09g33580 | BEE 1, putative, expressed                                        | -2.4 | -3.5 | -2.8 |
| Os.23107.1.S1_at       | LOC_Os11g11100 | bZIP transcription factor domain containing protein, expressed    | -1.1 | -1.2 | -1.6 |
| Os.42200.1.S1_at       | LOC_Os01g59760 | bZIP transcription factor, putative, expressed                    | -1.4 | -3.1 | -1.5 |
| Os.46836.1.S1_at       | LOC_Os10g38820 | bZIP family transcription factor, putative, expressed             | 1.5  | 4.3  | 2.3  |
| Os.49201.1.S1_at       | LOC_Os09g29820 | bZIP transcription factor domain containing protein, expressed    | -1   | -3.5 | -2   |
| Os.27178.1.S1_s_at     | LOC_Os04g54474 | transcription factor, putative, expressed                         | -1.8 | -2.1 | -1.4 |
| Os.18178.1.S1_at       | LOC_Os03g03560 | FHA domain containing protein, putative, expressed                | 3.4  | 1.4  | 2.4  |
| OsAffx.25077.1.S1_at   | LOC_Os03g12860 | homeobox associated leucine zipper, putative, expressed           | -3.9 | -1.3 | -1.4 |

|                        |                |                                                                   |      |      |      |
|------------------------|----------------|-------------------------------------------------------------------|------|------|------|
| Os.2365.1.S1_at        | LOC_Os06g04870 | homeobox associated leucine zipper, putative, expressed           | -1.3 | -8.1 | -2.8 |
| Os.38013.1.S1_a_at     | LOC_Os03g08960 | homeobox associated leucine zipper, putative, expressed           | 2.4  | 1.5  | 2.1  |
| Os.4784.1.S1_at        | LOC_Os09g31040 | EF hand family protein, putative, expressed                       | 4.6  | 5.6  | 4.3  |
| Os.49662.1.S1_at       | LOC_Os09g31000 | EF hand family protein, putative, expressed                       | 3.6  | 3.8  | 1.6  |
| Os.52062.1.S1_at       | LOC_Os09g30506 | EF hand family protein, putative, expressed                       | 1.7  | 3.8  | 1.6  |
| Os.46956.1.S1_at       | LOC_Os01g50940 | helix-loop-helix DNA-binding domain containing protein, expressed | 3.9  | 1.3  | 1.5  |
| Os.6043.1.S1_at        | LOC_Os04g23550 | basic helix-loop-helix family protein, putative, expressed        | 5.1  | 2.2  | 1.4  |
| OsAffx.24782.1.S1_s_at | LOC_Os02g48320 | DNA binding protein, putative, expressed                          | 2.3  | 2.1  | 2    |
| Os.10870.1.S1_at       | LOC_Os02g51890 | RNA recognition motif containing protein, putative, expressed     | 2.2  | 2.9  | 2.2  |
| Os.7338.1.S1_at        | LOC_Os07g28850 | retrotransposon protein, putative, unclassified, expressed        | 2.2  | 1.3  | 2.7  |
| Os.21875.1.S1_at       | LOC_Os01g74340 | RNA recognition motif containing protein, putative, expressed     | -1.4 | -1   | -1.7 |
| OsAffx.4480.1.S1_at    | LOC_Os05g30970 | copine, putative, expressed                                       | 1.1  | 2.4  | 2.5  |
| Os.11396.1.S1_at       | LOC_Os01g68060 | copine, putative, expressed                                       | 2    | 2.2  | 2.4  |
| Os.10091.1.S1_at       | LOC_Os03g19070 | long cell-linked locus protein, putative, expressed               | 2.7  | 2.3  | 1.5  |
| Os.21349.1.S1_at       | LOC_Os03g04020 | expansin precursor, putative, expressed                           | -2.5 | -1.1 | -1.7 |
| Os.2938.1.S1_at        | LOC_Os10g39640 | expansin precursor, putative, expressed                           | 1.3  | 1.3  | 1.3  |
| Os.49999.1.S1_x_at     | LOC_Os03g18910 | COBRA-like protein 7 precursor, putative, expressed               | 2.5  | 2.9  | 2.5  |
| Os.50966.1.S1_at       | LOC_Os02g32980 | Cupin domain containing protein, expressed                        | 2.2  | 2.9  | 1.1  |
| Os.51176.1.S1_at       | LOC_Os10g31320 | retrotransposon protein, putative, unclassified, expressed        | 2.4  | 5.4  | 1.5  |
| Os.51929.1.S1_at       | LOC_Os10g31330 | retrotransposon protein, putative, unclassified, expressed        | 1.7  | 3    | 1.1  |
| Os.53931.1.S1_at       | LOC_Os11g33030 | retrotransposon protein, putative, unclassified, expressed        | -1.4 | -1   | -1.2 |
| Os.9592.1.S1_at        | LOC_Os07g41310 | COBRA, putative, expressed                                        | 4.4  | 3.7  | 2.7  |
| Os.2081.1.S1_at        | LOC_Os01g19260 | ATPase, putative, expressed                                       | 3.1  | 5    | 5.3  |

|                  |                |                                                                                                                            |      |      |      |
|------------------|----------------|----------------------------------------------------------------------------------------------------------------------------|------|------|------|
| Os.22831.1.S1_at | LOC_Os03g50220 | homologous-pairing protein meu13, putative, expressed                                                                      | 3.5  | 1.5  | 1.6  |
| Os.34496.1.S1_at | LOC_Os03g61500 | uncharacterized Cys-rich domain containing protein, putative, expressed                                                    | 2.5  | 2.3  | 3.2  |
| Os.53268.1.S1_at | LOC_Os09g17152 | OsFBX319 - F-box domain containing protein, expressed                                                                      | 4.1  | 2.5  | 1.9  |
| Os.5999.1.S1_at  | LOC_Os12g28590 | ATPase 2, putative, expressed                                                                                              | 3.4  | 4.2  | 5.2  |
| Os.7332.1.S1_at  | LOC_Os02g07750 | cell cycle control protein, putative, expressed                                                                            | 1.5  | 1.1  | 1.2  |
| Os.13901.1.S1_at | LOC_Os01g67850 | zinc finger, RING-type, putative, expressed                                                                                | -2.5 | -2.1 | -2   |
| Os.14848.1.S1_at | LOC_Os06g48040 | zinc finger, C3HC4 type domain containing protein, expressed                                                               | 1.4  | 1.3  | 1.8  |
| Os.16933.1.S1_at | LOC_Os01g61990 | ankyrin repeat-containing protein, putative, expressed                                                                     | 1.5  | 2.4  | 2.7  |
| Os.17069.1.A1_at | LOC_Os02g05692 | zinc finger, C3HC4 type domain containing protein, expressed                                                               | -1.2 | -1.1 | -1.5 |
| Os.18565.1.S1_at | LOC_Os02g55480 | zinc finger, C3HC4 type domain containing protein, expressed                                                               | -2.6 | -2.1 | -1.4 |
| Os.25589.1.S1_at | LOC_Os11g25780 | PB1 domain containing protein, expressed                                                                                   | -2.3 | -1.2 | -1.7 |
| Os.25589.3.S1_at | LOC_Os11g25800 | expressed protein                                                                                                          | -1.9 | -1.1 | -1.2 |
| Os.26472.1.S1_at | LOC_Os04g40630 | BTBZ4 - Bric-a-Brac, Tramtrack, Broad Complex BTB domain with TAZ<br>zinc finger and Calmodulin-binding domains, expressed | 1.6  | 2.2  | 2.5  |
| Os.37969.1.S1_at | LOC_Os01g66860 | serine/threonine protein kinase, putative, expressed                                                                       | 5.3  | 2.1  | 2    |
| Os.37969.2.S1_at | LOC_Os01g66860 | serine/threonine protein kinase, putative, expressed                                                                       | 5.5  | 2.2  | 1.2  |
| Os.43892.1.S1_at | LOC_Os03g09070 | leucine rich repeat domain containing protein, putative, expressed                                                         | 4.7  | 5    | 3.7  |
| Os.49517.1.S1_at | LOC_Os05g35260 | PB1 domain containing protein, expressed                                                                                   | 2.3  | 1.2  | 2.2  |
| Os.52208.1.S1_at | LOC_Os11g45990 | von Willebrand factor type A domain containing protein, putative,<br>expressed                                             | 3.3  | 1.6  | 2.2  |
| Os.52699.1.S1_at | LOC_Os04g55420 | leucine-rich repeat family protein, putative, expressed                                                                    | 2.4  | 2.7  | 3.3  |
| Os.53612.1.S1_at | LOC_Os06g14450 | exo70 exocyst complex subunit family protein, putative, expressed                                                          | 2    | 2.8  | 2    |
| Os.54351.1.S1_at | LOC_Os08g31250 | C1-like domain containing protein, expressed                                                                               | 3    | 5.5  | 3.2  |

|                    |                |                                                                                                                  |      |      |      |
|--------------------|----------------|------------------------------------------------------------------------------------------------------------------|------|------|------|
| Os.57345.1.S1_at   | LOC_Os02g38120 | BTBN3 - Bric-a-Brac, Tramtrack, Broad Complex BTB domain with non-phototropic hypocotyl 3 NPH3 domain, expressed | -1.8 | -1.8 | -1.1 |
| Os.12296.1.S1_at   | LOC_Os03g39610 | chlorophyll A-B binding protein, putative, expressed                                                             | 1.4  | 1.7  | 2    |
| Os.28216.3.S1_x_at | LOC_Os07g37550 | chlorophyll A-B binding protein, putative, expressed                                                             | 1.7  | 4.5  | 1.9  |
| Os.28216.1.S1_a_at | LOC_Os01g52250 | starch synthase, putative, expressed                                                                             | 1.8  | 4.2  | 1.5  |
| Os.11923.1.S1_x_at | LOC_Os05g33630 | inosine-uridine preferring nucleoside hydrolase family protein, putative, expressed                              | 2.5  | 2.2  | 1.2  |
| Os.5616.1.S1_at    | LOC_Os03g18740 | oxidoreductase, short chain dehydrogenase/reductase family, putative, expressed                                  | 2.7  | 3.7  | 3.8  |
| Os.30239.1.S1_at   | LOC_Os07g46910 | sex determination protein tasselseed-2, putative, expressed                                                      | 2.9  | 3.3  | 2.4  |
| Os.15281.1.S1_x_at | LOC_Os07g46920 | sex determination protein tasselseed-2, putative, expressed                                                      | 6.5  | 2.7  | 4.2  |
| Os.18467.1.S1_s_at | LOC_Os11g09010 | lipase, putative, expressed                                                                                      | 3.4  | 3.1  | 3.3  |
| Os.28042.1.S1_a_at | LOC_Os04g35560 | glutathione S-transferase, putative, expressed                                                                   | 1.1  | 1.7  | 1.6  |
| Os.31992.1.S1_at   | LOC_Os03g05920 | expressed protein                                                                                                | 2.4  | 1.7  | 1.6  |
| Os.46115.1.S1_at   | LOC_Os05g29990 | NAD dependent epimerase/dehydratase family domain containing protein, expressed                                  | 1.3  | 1.4  | 1.3  |
| Os.48005.1.S1_x_at | LOC_Os01g67600 | CXE carboxylesterase, putative, expressed                                                                        | 1.1  | 1    | 1.4  |
| Os.49135.1.S1_at   | LOC_Os01g72520 | phosphoesterase family protein, putative, expressed                                                              | -1   | -1.6 | -2   |
| Os.52414.1.S1_at   | LOC_Os02g19650 | hydrolase, alpha/beta fold family domain containing protein, expressed                                           | 3.8  | 2.4  | 2.1  |
| Os.5557.1.S1_at    | LOC_Os03g02514 | hydrolase, alpha/beta fold family protein, putative, expressed                                                   | 2.3  | 1.8  | 1.9  |
| Os.55991.1.S1_at   | LOC_Os10g39090 | hydrolase, alpha/beta fold family protein, putative, expressed                                                   | 3    | 2.6  | 2.6  |
| Os.17325.1.S1_at   | LOC_Os03g03200 | hydrolase, alpha/beta fold family protein, putative, expressed                                                   | 2.9  | 1.3  | 2.1  |
| Os.5809.1.S1_s_at  | LOC_Os11g46000 | von Willebrand factor type A domain containing protein, putative, expressed                                      | 3.6  | 1.6  | 4.9  |

|                        |                |                                                                           |      |      |      |
|------------------------|----------------|---------------------------------------------------------------------------|------|------|------|
| Os.7727.1.S1_at        | LOC_Os05g11910 | GDSL-like lipase/acylhydrolase, putative, expressed                       | 1.9  | 3.4  | 2.4  |
| Os.7804.1.S1_at        | LOC_Os02g15230 | GDSL-like lipase/acylhydrolase, putative, expressed                       | 1    | 1.1  | 1.4  |
| Os.54232.1.S1_at       | LOC_Os05g37190 | ZOS5-08 - C2H2 zinc finger protein, expressed                             | 4.5  | 2.1  | 1.2  |
| Os.36152.1.S1_at       | LOC_Os01g63980 | ZOS1-17 - C2H2 zinc finger protein, expressed                             | 2.7  | 1.5  | 1    |
| Os.11997.1.S1_at       | LOC_Os07g48510 | thioredoxin, putative, expressed                                          | -1.9 | -1.3 | -1.9 |
| Os.12385.1.S1_at       | LOC_Os03g57340 | chaperone protein dnaJ, putative, expressed                               | 1.3  | 1    | 1.1  |
| Os.26059.1.S1_s_at     | LOC_Os03g20730 | chaperone protein dnaJ, putative, expressed                               | 1.3  | 1.5  | 1.8  |
| Os.31185.1.S1_at       | LOC_Os01g13950 | OsGrx_A1 - glutaredoxin subgroup III, expressed                           | 4.3  | 4.4  | 3.2  |
| Os.31431.1.S1_at       | LOC_Os01g40580 | hypersensitive-induced response protein, putative, expressed              | 3.2  | 1.6  | 1.7  |
| Os.35808.1.S1_at       | LOC_Os01g42190 | heat shock protein DnaJ, putative, expressed                              | 3.1  | 2.6  | 2.6  |
| Os.57054.1.S1_at       | LOC_Os02g17000 | OsSub14 - Putative Subtilisin homologue, expressed                        | 2.1  | 5.5  | 5    |
| Os.9554.1.S1_at        | LOC_Os04g52504 | adhesive/proline-rich protein, putative, expressed                        | 1.3  | 1.6  | 1.2  |
| OsAffx.25169.1.S1_s_at | LOC_Os03g20730 | chaperone protein dnaJ, putative, expressed                               | 1.8  | 1.7  | 2.5  |
| OsAffx.30738.1.S1_at   | LOC_Os10g40650 | holliday junction resolvase, putative, expressed                          | 4.4  | 2    | 2.6  |
| Os.49580.1.S1_at       | LOC_Os12g19304 | Fe-S metabolism associated domain containing protein, expressed           | -6.6 | -5   | -5.3 |
| Os.7130.1.S1_at        | LOC_Os10g42690 | jmjC domain containing protein, expressed                                 | 3.5  | 2.1  | 3.4  |
| Os.7130.2.S1_x_at      | LOC_Os10g42690 | jmjC domain containing protein, expressed                                 | 3.1  | 1.8  | 3.5  |
| Os.47877.1.S1_at       | LOC_Os02g27810 | MazG nucleotide pyrophosphohydrolase domain containing protein, expressed | -2.7 | -4   | -3.5 |
| Os.52754.2.S1_at       | LOC_Os03g50220 | homologous-pairing protein meu13, putative, expressed                     | 3.6  | 1.4  | 1.6  |
| Os.9889.1.S1_at        | LOC_Os06g19730 | HEAT repeat family protein, putative, expressed                           | -1.3 | -1.4 | -1.2 |
| Os.52509.1.S1_at       | LOC_Os04g33950 | E2F family transcription factor protein, putative, expressed              | 2.3  | 2.3  | 2.3  |
| Os.53052.1.S1_at       | LOC_Os01g67820 | exo70 exocyst complex subunit domain containing protein, expressed        | 2.6  | 3.1  | 2.6  |

|                       |                |                                                                                   |      |      |      |
|-----------------------|----------------|-----------------------------------------------------------------------------------|------|------|------|
| Os.26884.1.S1_a_at    | LOC_Os01g67810 | transposon protein, putative, unclassified, expressed                             | 2.3  | 2.5  | 2.1  |
| Os.55395.1.S1_s_at    | LOC_Os06g45570 | VQ domain containing protein, putative, expressed                                 | 1.6  | 1    | 1.3  |
| Os.10682.1.S1_at      | LOC_Os08g05960 | expressed protein                                                                 | 1    | 1.6  | 1.4  |
| Os.11478.1.S1_at      | LOC_Os09g38440 | ATXR, putative, expressed                                                         | -2.1 | -1   | -4.3 |
| Os.14616.1.S1_at      | LOC_Os07g34260 | chalcone and stilbene synthases, putative, expressed                              | 4.8  | 1.8  | 4.8  |
| Os.21367.1.S1_at      | LOC_Os10g34170 | glutaredoxin domain containing protein, putative, expressed                       | 4.2  | 1.6  | 1.6  |
| Os.46604.1.S1_s_at    | LOC_Os01g35330 | circumsporozoite protein precursor, putative, expressed                           | 3    | 2.1  | 1.8  |
| Os.4773.1.S1_at       | LOC_Os06g04240 | expressed protein                                                                 | 1.7  | 1.8  | 1.2  |
| Os.51226.1.S1_at      | LOC_Os03g52910 | uncharacterized UPF0114 domain containing protein, expressed                      | 1    | 2    | 2.4  |
| Os.7567.1.S1_at       | LOC_Os10g40614 | LTPL147 - Protease inhibitor/seed storage/LTP family protein precursor, expressed | -1.2 | -2   | -1.9 |
| Os.8914.1.S1_at       | LOC_Os03g19020 | PHD-finger family protein, expressed                                              | 2.7  | 2.2  | 2.2  |
| Os.9971.1.S1_s_at     | LOC_Os02g42850 | MYB family transcription factor, putative, expressed                              | 2.9  | 1.8  | 3.3  |
| OsAffx.3240.1.S1_s_at | LOC_Os03g14370 | ACT domain containing protein, expressed                                          | 2.6  | 2.8  | 2.9  |
| Os.10038.1.S1_s_at    | LOC_Os07g05840 | expressed protein                                                                 | 3.2  | 3.3  | 3.2  |
| Os.10266.1.S1_at      | LOC_Os03g43100 | expressed protein                                                                 | 8.7  | 7.7  | 7.8  |
| Os.10390.1.S1_at      | LOC_Os03g55430 | expressed protein                                                                 | 3.4  | 3    | 1.8  |
| Os.10502.1.S1_at      | LOC_Os07g28614 | expressed protein                                                                 | -1.9 | -1.3 | -1.5 |
| Os.10736.1.S1_at      | LOC_Os06g05440 | expressed protein                                                                 | -2.7 | -2   | -1.6 |
| Os.10982.1.S1_at      | LOC_Os02g46170 | expressed protein                                                                 | 1.7  | 3.5  | 1.6  |
| Os.11147.1.S1_at      | LOC_Os07g37280 | hypothetical protein                                                              | 2.1  | 2.3  | 1.3  |
| Os.11471.1.S1_at      | LOC_Os04g54610 | expressed protein                                                                 | 2.8  | 1.4  | 2.4  |
| Os.11730.1.S1_at      | LOC_Os05g21180 | phosphatidic acid phosphatase-related, putative, expressed                        | 1.8  | 1.7  | 1.9  |



|                    |                |                                                                       |      |      |      |
|--------------------|----------------|-----------------------------------------------------------------------|------|------|------|
| Os.11906.1.S1_at   | LOC_Os01g50350 | expressed protein                                                     | 5.6  | 6.3  | 4.1  |
| Os.11970.1.S1_at   | LOC_Os09g20240 | DUF581 domain containing protein, expressed                           | -1.4 | -1.6 | -1.5 |
| Os.11970.2.S1_x_at | LOC_Os09g20240 | DUF581 domain containing protein, expressed                           | -1.5 | -1.4 | -1.8 |
| Os.12043.1.S1_at   | LOC_Os01g44120 | expressed protein                                                     | 3    | 2.6  | 1.6  |
| Os.12176.1.S1_at   | LOC_Os03g07590 | expressed protein                                                     | 1.2  | 3.6  | 3.3  |
| Os.13954.1.S1_x_at | LOC_Os08g31950 | expressed protein                                                     | 1.4  | 1    | 1.4  |
| Os.14198.1.S1_at   | LOC_Os01g61760 | myosin heavy chain-related, putative, expressed                       | 1.5  | 1.9  | 2.3  |
| Os.14210.1.S1_at   | LOC_Os10g36360 | expressed protein                                                     | 2    | 3.5  | 5.8  |
| Os.14407.1.S1_at   | LOC_Os08g01890 | DNA binding protein, putative, expressed                              | 2.2  | 1.5  | 1.5  |
| Os.14828.1.A1_s_at | LOC_Os09g20390 | uncharacterized glycosyl hydrolase Rv2006/MT2062, putative, expressed | 2.5  | 1.8  | 1.6  |
| Os.14835.2.S1_at   | LOC_Os02g31080 | hydroxyproline-rich glycoprotein family protein, putative, expressed  | 1.7  | 1.9  | 1.8  |
| Os.15317.1.A1_at   | LOC_Os02g31867 | expressed protein                                                     | 2.1  | 2.4  | 3    |
| Os.15574.1.S1_at   | LOC_Os03g08390 | expressed protein                                                     | 1.4  | 2.6  | 2.3  |
| Os.16011.1.A1_at   | LOC_Os06g43990 | expressed protein                                                     | -1.7 | -1.3 | -1.2 |
| Os.16435.1.S1_at   | LOC_Os02g53410 | expressed protein                                                     | 3.1  | 1.7  | 1.9  |
| Os.17054.1.S1_at   | LOC_Os03g14310 | expressed protein                                                     | -1.9 | -1.1 | -1.8 |
| Os.17677.1.S1_at   | LOC_Os06g03810 | expressed protein                                                     | 1.7  | 2.7  | 1.9  |
| Os.17768.1.S1_at   | LOC_Os06g41930 | zinc-binding protein, putative, expressed                             | -1.5 | -1.7 | -1.2 |
| Os.17797.1.A1_at   | LOC_Os02g44880 | expressed protein                                                     | 3.5  | 2.3  | 2.6  |
| Os.18318.1.S1_at   | LOC_Os03g10240 | DUF677 domain containing protein, putative, expressed                 | 1.3  | 1.6  | 1.6  |
| Os.1880.2.S1_a_at  | LOC_Os01g50840 | expressed protein                                                     | 1.2  | 1.1  | 2.2  |
| Os.18941.1.S1_at   | LOC_Os07g03050 | expressed protein                                                     | 2.5  | 1.8  | 3.3  |
| Os.19385.1.S1_at   | LOC_Os01g52730 | DUF584 domain containing protein, putative, expressed                 | 1.6  | 2.4  | 1    |

|                    |                |                                                                        |      |      |      |
|--------------------|----------------|------------------------------------------------------------------------|------|------|------|
| Os.20501.1.S1_at   | LOC_Os07g47670 | hypoxia-responsive family protein, putative, expressed                 | 1.1  | 2    | 1.1  |
| Os.20717.1.S1_at   | LOC_Os01g61460 | leaf senescence related protein, putative, expressed                   | 3.1  | 2.4  | 4.2  |
| Os.23209.1.S1_at   | LOC_Os05g39350 | PMR5, putative, expressed                                              | 1    | 2.3  | 2.8  |
| Os.23216.2.S1_x_at | LOC_Os07g02990 | expressed protein                                                      | 2.1  | 2.9  | 4.2  |
| Os.23606.1.S1_at   | LOC_Os01g29330 | expressed protein                                                      | 3.8  | 3.7  | 1.5  |
| Os.2426.1.A1_at    | LOC_Os11g10470 | expressed protein                                                      | 2.4  | 2.9  | 2.4  |
| Os.26380.1.S1_at   | LOC_Os01g55280 | expressed protein                                                      | 1.3  | 1.8  | 3    |
| Os.26469.1.S1_at   | LOC_Os03g56220 | stress-induced protein, putative, expressed                            | 1.5  | 1.7  | 1.6  |
| Os.27536.1.A1_at   | LOC_Os03g07920 | expressed protein                                                      | -2.3 | -2.9 | -2.3 |
| Os.27557.1.S1_at   | LOC_Os02g29300 | expressed protein                                                      | -3.7 | -3   | -4.2 |
| Os.27569.1.S2_at   | LOC_Os11g03760 | expressed protein                                                      | 1.6  | 2.4  | 1.4  |
| Os.27800.1.A1_at   | LOC_Os03g58740 | expressed protein                                                      | 2    | 1.7  | 2.5  |
| Os.28798.1.S1_at   | LOC_Os01g58310 | expressed protein                                                      | 2.3  | 3.6  | 1.8  |
| Os.29923.1.S1_at   | LOC_Os06g36380 | expressed protein                                                      | -1   | -1.2 | -1.5 |
| Os.30059.1.S1_at   | LOC_Os01g60420 | expressed protein                                                      | 4.5  | 3.1  | 2.7  |
| Os.30059.2.S1_x_at | LOC_Os01g60420 | expressed protein                                                      | 3.4  | 2    | 1.8  |
| Os.30124.1.S1_at   | LOC_Os10g30880 | expressed protein                                                      | 3.9  | 1.5  | 2.6  |
| Os.30779.1.S1_at   | LOC_Os01g63500 | expressed protein                                                      | -1.6 | -1   | -3.2 |
| Os.30993.1.S1_at   | LOC_Os07g12390 | expressed protein                                                      | -1.6 | -1.1 | -1.2 |
| Os.31233.2.S1_at   | LOC_Os01g16140 | expressed protein                                                      | 1.7  | 4.4  | 3.8  |
| Os.31991.1.S1_s_at | LOC_Os11g02290 | expressed protein                                                      | 3.2  | 4.6  | 2.8  |
| Os.32602.1.S1_at   | LOC_Os01g74370 | domain of unknown function DUF966 domain containing protein, expressed | 3.8  | 3    | 3.3  |
| Os.32889.1.S1_at   | LOC_Os07g03040 | expressed protein                                                      | 8.7  | 6.8  | 9.2  |

|                    |                |                                                                                   |      |      |      |
|--------------------|----------------|-----------------------------------------------------------------------------------|------|------|------|
| Os.34196.1.S1_at   | LOC_Os01g60110 | E2F-related protein, putative, expressed                                          | 4.9  | 2    | 2.2  |
| Os.34819.1.S1_at   | LOC_Os07g22494 | expressed protein                                                                 | 1.6  | 1.4  | 1.9  |
| Os.34819.2.S1_x_at | LOC_Os07g22494 | expressed protein                                                                 | 1.5  | 1.1  | 1.4  |
| Os.34819.3.S1_x_at | LOC_Os07g22494 | expressed protein                                                                 | 1.7  | 1    | 2    |
| Os.36558.1.S1_at   | LOC_Os11g02290 | expressed protein                                                                 | 1.9  | 6.1  | 3    |
| Os.3721.1.S1_at    | LOC_Os01g03980 | expressed protein                                                                 | -1.4 | -1.3 | -2.1 |
| Os.37229.1.S1_at   | LOC_Os02g46210 | DUF581 domain containing protein, expressed                                       | 1.7  | 2.7  | 1.5  |
| Os.37243.1.S1_at   | LOC_Os01g51670 | expressed protein                                                                 | 2    | 1.5  | 1.4  |
| Os.37243.2.S1_x_at | LOC_Os01g51670 | expressed protein                                                                 | 1.8  | 1.3  | 1.4  |
| Os.37376.1.S1_at   | LOC_Os01g70820 | luminal PsbP, putative, expressed                                                 | 2.1  | 1    | 1.3  |
| Os.37509.1.S1_at   | LOC_Os01g50040 | DNA binding protein, putative, expressed                                          | 2.2  | 1.7  | 1.4  |
| Os.37509.2.S1_x_at | LOC_Os01g50040 | DNA binding protein, putative, expressed                                          | 1.2  | 1.3  | 1.2  |
| Os.3808.4.S1_x_at  | LOC_Os01g09220 | transposon protein, putative, CACTA, En/Spm sub-class, expressed                  | 2    | 1    | 1.4  |
| Os.38235.1.S1_at   | LOC_Os04g52260 | LTPL124 - Protease inhibitor/seed storage/LTP family protein precursor, expressed | 2.8  | 2.4  | 3.2  |
| Os.38309.1.S1_at   | LOC_Os06g36390 | expressed protein                                                                 | -1.5 | -1.5 | -2   |
| Os.428.1.S1_at     | LOC_Os03g55770 | expressed protein                                                                 | 1.4  | 3.3  | 2.2  |
| Os.43236.1.S1_at   | LOC_Os08g32520 | expressed protein                                                                 | -1.1 | -1.6 | -2.5 |
| Os.43929.1.S1_s_at | LOC_Os03g02470 | expressed protein                                                                 | 8.7  | 8.3  | 7.4  |
| Os.45412.1.S1_at   | LOC_Os01g04690 | expressed protein                                                                 | 2.1  | 1.4  | 1    |
| Os.45427.1.A1_at   | LOC_Os01g04120 | ZOS1-03 - C2H2 zinc finger protein, expressed                                     | -1.4 | -2.6 | -3.1 |
| Os.45902.1.A1_at   | LOC_Os02g30330 | expressed protein                                                                 | 4    | 2.6  | 1.3  |
| Os.45934.1.S1_at   | LOC_Os01g09770 | expressed protein                                                                 | 3.1  | 2.8  | 2.5  |

|                    |                |                                                                |      |      |      |
|--------------------|----------------|----------------------------------------------------------------|------|------|------|
| Os.46029.1.A1_at   | LOC_Os01g48940 | expressed protein                                              | -1.4 | -1   | -1.5 |
| Os.46431.1.S1_at   | LOC_Os01g35330 | circumsporozoite protein precursor, putative, expressed        | 5.1  | 3.6  | 3.8  |
| Os.46835.1.S1_at   | LOC_Os10g21860 | expressed protein                                              | -1   | -2.2 | -1.3 |
| Os.46941.1.S1_s_at | LOC_Os06g48500 | expressed protein                                              | -1.3 | -1.4 | -1.2 |
| Os.47568.1.A1_s_at | LOC_Os04g07890 | AGAP002737-PA, putative, expressed                             | 1.3  | 1.6  | 1.9  |
| Os.47598.1.S1_at   | LOC_Os01g12190 | expressed protein                                              | 4.4  | 1.1  | 2.9  |
| Os.47741.1.S1_x_at | LOC_Os04g42770 | expressed protein                                              | 1.5  | 2.3  | 1.6  |
| Os.4782.1.S1_at    | LOC_Os03g58764 | OsFBDUF18 - F-box and DUF domain containing protein, expressed | 2.3  | 1.9  | 1.5  |
| Os.4881.1.S1_s_at  | LOC_Os07g41600 | proline-rich protein, putative, expressed                      | 2.1  | 2.1  | 3.2  |
| Os.49074.1.A1_at   | LOC_Os07g37290 | expressed protein                                              | -1.7 | -1   | -1.6 |
| Os.4940.1.S1_at    | LOC_Os06g46970 | wound induced protein, putative, expressed                     | 1.4  | 3.2  | 2.1  |
| Os.49479.1.S1_at   | LOC_Os05g05020 | expressed protein                                              | 2.5  | 1.6  | 2.8  |
| Os.49502.1.S1_at   | LOC_Os08g15650 | expressed protein                                              | 2.9  | 1.7  | 2.1  |
| Os.49582.1.S1_at   | LOC_Os02g45930 | expressed protein                                              | -2   | -2.3 | -2.3 |
| Os.49583.1.S1_at   | LOC_Os03g15080 | expressed protein                                              | 2.9  | 1.4  | 1    |
| Os.4999.1.S1_at    | LOC_Os06g50230 | expressed protein                                              | -1.4 | -2   | -2.8 |
| Os.50180.1.S1_at   | LOC_Os05g05100 | expressed protein                                              | 3.7  | 2.3  | 5.8  |
| Os.50249.1.S1_x_at | LOC_Os03g21640 | expressed protein                                              | 2.7  | 1.7  | 2.1  |
| Os.50438.1.S1_at   | LOC_Os02g36530 | expressed protein                                              | 2.8  | 2.9  | 2.7  |
| Os.51005.1.S1_at   | LOC_Os11g05530 | expressed protein                                              | 1.9  | 1.2  | 1.3  |
| Os.51009.1.S1_x_at | LOC_Os02g53700 | DENN domain containing protein, expressed                      | -2.9 | -2.1 | -1.6 |
| Os.5117.1.S1_at    | LOC_Os04g39890 | expressed protein                                              | 3.1  | 2.3  | 5.2  |
| Os.51323.1.S1_at   | LOC_Os12g14540 | expressed protein                                              | 1.9  | 1.5  | 1.6  |

|                    |                |                                                                  |      |      |      |
|--------------------|----------------|------------------------------------------------------------------|------|------|------|
| Os.51557.1.S1_at   | LOC_Os02g11705 | expressed protein                                                | -2.9 | -2.9 | -1.7 |
| Os.51606.1.S1_at   | LOC_Os12g43870 | expressed protein                                                | 4.1  | 2.6  | 2.1  |
| Os.51629.1.S1_at   | LOC_Os02g09850 | expressed protein                                                | -1.5 | -1.7 | -1.7 |
| Os.51741.1.S1_at   | LOC_Os05g25920 | expressed protein                                                | 3.8  | 3.2  | 2.4  |
| Os.51851.1.S1_at   | LOC_Os09g25580 | monogalactosyldiacylglycerol synthase, putative, expressed       | 2.1  | 3.3  | 2.3  |
| Os.52280.1.S1_at   | LOC_Os06g46149 | serine/arginine repetitive matrix protein 1, putative, expressed | 2.1  | 3.9  | 3.7  |
| Os.52355.1.S1_at   | LOC_Os06g33880 | expressed protein                                                | -1.9 | -1.7 | -3   |
| Os.52377.1.S1_s_at | LOC_Os02g13370 | expressed protein                                                | -1.2 | -2.1 | -2.5 |
| Os.52394.2.S1_at   | LOC_Os12g39440 | expressed protein                                                | -1.2 | -1   | -1.4 |
| Os.52490.1.S1_at   | LOC_Os07g09625 | expressed protein                                                | -2.3 | -1.3 | -1.6 |
| Os.52777.1.S1_s_at | LOC_Os05g36340 | expressed protein                                                | -1.5 | -1.4 | -1.3 |
| Os.52886.1.S1_at   | LOC_Os03g25750 | SNARE associated Golgi protein, putative, expressed              | 1.8  | 2.1  | 2.8  |
| Os.53074.1.S1_at   | LOC_Os03g20330 | VQ domain containing protein, putative, expressed                | 4.5  | 2.3  | 2.2  |
| Os.53258.1.S1_at   | LOC_Os03g60220 | DUF567 domain containing protein, putative, expressed            | 2.3  | 1.7  | 1.7  |
| Os.53473.1.S1_at   | LOC_Os03g05460 | expressed protein                                                | 3.1  | 2    | 1.9  |
| Os.53581.1.S1_at   | LOC_Os09g37080 | expressed protein                                                | 1.9  | 1.8  | 1.6  |
| Os.53687.1.S1_at   | LOC_Os09g17146 | expressed protein                                                | 6.9  | 2.1  | 1.7  |
| Os.5384.1.S1_at    | LOC_Os06g21400 | expressed protein                                                | 1.7  | 1.1  | 1    |
| Os.54006.1.S1_at   | LOC_Os04g27950 | expressed protein                                                | -1.6 | -1.7 | -1.4 |
| Os.54006.1.S1_at   | LOC_Os04g27950 | expressed protein                                                | -1.6 | -1.7 | -1.4 |
| Os.54463.1.S1_at   | LOC_Os05g48680 | expressed protein                                                | 3.8  | 2.2  | 1.5  |
| Os.54549.1.S1_at   | LOC_Os08g36590 | antifreeze glycoprotein, putative, expressed                     | -1.8 | -1.4 | -1.6 |
| Os.5458.1.A1_at    | LOC_Os01g70470 | expressed protein                                                | 1.4  | 1.1  | 1.2  |

|                    |                |                                                                          |      |      |      |
|--------------------|----------------|--------------------------------------------------------------------------|------|------|------|
| Os.54951.1.S1_at   | LOC_Os04g03920 | expressed protein                                                        | 4.7  | 1.5  | 1.6  |
| Os.55093.1.S1_at   | LOC_Os03g04370 | protein-methionine-S-oxide reductase, putative, expressed                | 1.9  | 1.3  | 1.2  |
| Os.55247.1.S1_at   | LOC_Os05g50100 | expressed protein                                                        | 4.2  | 2.6  | 1.9  |
| Os.55253.1.S1_at   | LOC_Os05g11610 | expressed protein                                                        | 6    | 3.1  | 1.1  |
| Os.55266.1.S1_at   | LOC_Os07g10620 | expressed protein                                                        | -1.6 | -1.5 | -1.8 |
| Os.55272.1.S1_at   | LOC_Os01g03130 | expressed protein                                                        | 1.7  | 2.6  | 1.8  |
| Os.55343.1.S1_at   | LOC_Os04g56030 | glycine-rich cell wall structural protein precursor, putative, expressed | 3.5  | 3.1  | 1.6  |
| Os.55360.1.S1_at   | LOC_Os02g50710 | expressed protein                                                        | 3    | 2.3  | 2.7  |
| Os.55372.1.S1_x_at | LOC_Os02g02730 | expressed protein                                                        | 3.7  | 1.9  | 3.8  |
| Os.55382.1.S1_at   | LOC_Os03g08940 | expressed protein                                                        | 3.5  | 2.5  | 1.8  |
| Os.55392.1.S1_at   | LOC_Os02g57350 | expressed protein                                                        | 2.8  | 1.4  | 2.2  |
| Os.55407.1.S1_at   | LOC_Os03g58500 | expressed protein                                                        | 7.5  | 3.2  | 4.6  |
| Os.55448.1.S1_at   | LOC_Os02g11870 | expressed protein                                                        | 4.3  | 2.8  | 1.9  |
| Os.55531.1.S1_at   | LOC_Os03g32420 | expressed protein                                                        | 4    | 2    | 1.9  |
| Os.55532.1.S1_at   | LOC_Os03g02300 | expressed protein                                                        | 2    | 3.9  | 3.6  |
| Os.55634.1.S1_at   | LOC_Os03g19260 | expressed protein                                                        | 2    | 2    | 2.3  |
| Os.55699.1.S1_at   | LOC_Os08g40500 | expressed protein                                                        | -1.4 | -1.4 | -1.1 |
| Os.55850.1.S1_at   | LOC_Os08g34800 | expressed protein                                                        | 1.8  | 1.2  | 1.3  |
| Os.55984.1.S1_at   | LOC_Os05g46840 | proline-rich protein, putative, expressed                                | 3.5  | 2.5  | 2.1  |
| Os.56014.1.S1_at   | LOC_Os01g40190 | retrotransposon protein, putative, unclassified, expressed               | 1.4  | 1.3  | 2.4  |
| Os.56018.1.S1_at   | LOC_Os05g44060 | expressed protein                                                        | 1.5  | 1.3  | 1.1  |
| Os.56019.1.S1_at   | LOC_Os06g04480 | expressed protein                                                        | -1.6 | -1.1 | -1   |
| Os.56086.1.S1_at   | LOC_Os10g30880 | expressed protein                                                        | 1.8  | 1.9  | 1.6  |

|                   |                |                                                                |      |      |      |
|-------------------|----------------|----------------------------------------------------------------|------|------|------|
| Os.56173.1.S1_at  | LOC_Os04g45340 | expressed protein                                              | 2.9  | 3.6  | 2.5  |
| Os.56964.1.S1_at  | LOC_Os06g46980 | expressed protein                                              | 2.8  | 3.2  | 2.7  |
| Os.57152.1.S1_at  | LOC_Os02g38890 | expressed protein                                              | 3.5  | 1.2  | 2    |
| Os.57191.1.S1_at  | LOC_Os06g05470 | expressed protein                                              | 4.4  | 1.1  | 2    |
| Os.57301.1.S1_at  | LOC_Os02g52170 | expressed protein                                              | 1.4  | 3.1  | 2.3  |
| Os.57343.1.S1_at  | LOC_Os02g50110 | expressed protein                                              | 3.8  | 4.2  | 1.1  |
| Os.5736.1.S1_s_at | LOC_Os10g26620 | dof zinc finger domain containing protein, putative, expressed | -1.4 | -1.7 | -1.3 |
| Os.5774.1.S1_at   | LOC_Os10g34795 | expressed protein                                              | -1.5 | -1.5 | -1.1 |
| Os.6048.1.A1_at   | LOC_Os04g11030 | expressed protein                                              | -1.4 | -2.2 | -2.7 |
| Os.606.1.S1_at    | LOC_Os06g04220 | expressed protein                                              | 1.5  | 1.6  | 1.6  |
| Os.6129.1.S1_at   | LOC_Os11g43990 | expressed protein                                              | 2.4  | 2.4  | 2.7  |
| Os.6152.1.S1_at   | LOC_Os05g08900 | expressed protein                                              | 2.3  | 1.7  | 1.3  |
| Os.6242.1.S1_s_at | LOC_Os07g41600 | proline-rich protein, putative, expressed                      | 1.6  | 1.8  | 1.2  |
| Os.6304.1.S1_at   | LOC_Os08g31090 | expressed protein                                              | 2.6  | 2.8  | 2.8  |
| Os.6376.1.S1_at   | LOC_Os06g10210 | expressed protein                                              | 3    | 2.5  | 2.4  |
| Os.6581.1.S1_at   | LOC_Os10g43060 | expressed protein                                              | 2.5  | 1.9  | 1.7  |
| Os.6683.1.S1_at   | LOC_Os01g58130 | expressed protein                                              | 1.8  | 1.6  | 2.4  |
| Os.6723.1.S1_at   | LOC_Os02g33330 | expressed protein                                              | 2.3  | 4.8  | 2.2  |
| Os.6764.1.S1_at   | LOC_Os04g54310 | expressed protein                                              | 1.5  | 2.6  | 1.1  |
| Os.7206.1.S1_at   | LOC_Os01g45250 | DUF1645 domain containing protein, putative, expressed         | 3.1  | 1    | 1.4  |
| Os.7770.1.S1_at   | LOC_Os05g05030 | expressed protein                                              | 1.8  | 1.1  | 2.6  |
| Os.8052.1.S1_at   | LOC_Os03g51390 | expressed protein                                              | 2.2  | 2.7  | 1.4  |
| Os.8260.1.S1_at   | LOC_Os10g28680 | DUF581 domain containing protein, expressed                    | -3.3 | -2.1 | -2.8 |

|                        |                |                                                                        |      |      |      |
|------------------------|----------------|------------------------------------------------------------------------|------|------|------|
| Os.8444.1.S1_s_at      | LOC_Os04g57700 | expressed protein                                                      | -1   | -1.4 | -1.2 |
| Os.8480.1.S1_at        | LOC_Os05g30700 | expressed protein                                                      | 1.2  | 2.1  | 1.9  |
| Os.8527.1.S1_at        | LOC_Os03g10920 | syntaxin 6, N-terminal domain containing protein, expressed            | 1.6  | 1.1  | 1.3  |
| Os.8527.2.S1_x_at      | LOC_Os10g20240 | syntaxin 6, N-terminal domain containing protein, expressed            | 2.3  | 1    | 1.2  |
| Os.8568.1.S1_at        | LOC_Os11g17350 | expressed protein                                                      | -1.6 | -2   | -1.5 |
| Os.8774.1.S1_at        | LOC_Os05g37520 | expressed protein                                                      | 1.4  | 1.3  | 1.5  |
| Os.8823.1.S1_at        | LOC_Os03g02470 | expressed protein                                                      | 10.5 | 10.1 | 7.7  |
| Os.8824.1.S1_at        | LOC_Os01g59900 | expressed protein                                                      | 1.8  | 1.3  | 1    |
| Os.9002.1.S1_at        | LOC_Os09g13590 | expressed protein                                                      | -2   | -2.8 | -3.2 |
| Os.9113.1.S1_a_at      | LOC_Os01g51010 | DUF292 domain containing protein, expressed                            | 1    | 1.1  | 1.2  |
| Os.9113.3.S1_x_at      | LOC_Os01g51010 | DUF292 domain containing protein, expressed                            | 1    | 1    | 1.2  |
| Os.9154.1.S1_at        | LOC_Os01g56220 | expressed protein                                                      | 3.1  | 1.3  | 1.6  |
| Os.9276.1.S1_s_at      | LOC_Os07g07900 | expressed protein                                                      | -1.8 | -1.3 | -2.7 |
| Os.9930.1.S1_at        | LOC_Os02g33060 | expressed protein                                                      | -2   | -1.9 | -2   |
| OsAffx.11145.1.S1_s_at | LOC_Os01g21590 | homeodomain, putative, expressed                                       | 2.5  | 3.1  | 2.9  |
| OsAffx.11368.1.S1_at   | LOC_Os01g37920 | expressed protein                                                      | 1    | 1.3  | 1    |
| OsAffx.11849.1.S1_s_at | LOC_Os01g74670 | expressed protein                                                      | -1.1 | -1.6 | -1.2 |
| OsAffx.12055.2.S1_at   | LOC_Os02g15500 | plant protein of unknown function domain containing protein, expressed | 2    | 4.1  | 3.1  |
| OsAffx.12326.1.S1_at   | LOC_Os02g33060 | expressed protein                                                      | -1.9 | -1.4 | -1.5 |
| OsAffx.12554.1.S1_at   | LOC_Os02g48640 | expressed protein                                                      | 1.5  | 1    | 1.4  |
| OsAffx.13437.1.S1_at   | LOC_Os03g50280 | GLTP domain containing protein, putative, expressed                    | 3.6  | 2.3  | 2    |
| OsAffx.13491.1.S1_at   | LOC_Os03g55180 | DUF1336 domain containing protein, expressed                           | 2    | 1.4  | 1.3  |
| OsAffx.13717.1.S1_s_at | LOC_Os04g07890 | AGAP002737-PA, putative, expressed                                     | 1.2  | 1.7  | 1.1  |



|                         |                |                                                            |      |      |      |
|-------------------------|----------------|------------------------------------------------------------|------|------|------|
| OsAffx.14474.1.S1_at    | LOC_Os04g58890 | expressed protein                                          | 1.8  | 1.3  | 1.2  |
| OsAffx.14600.1.S1_at    | LOC_Os05g08830 | expressed protein                                          | 5.5  | 4.5  | 5.2  |
| OsAffx.15140.1.S1_at    | LOC_Os05g47960 | expressed protein                                          | 2.6  | 2    | 1.3  |
| OsAffx.15421.1.S1_at    | LOC_Os06g14180 | expressed protein                                          | 3.5  | 6.4  | 5.6  |
| OsAffx.16648.1.S1_at    | LOC_Os07g40040 | expressed protein                                          | 1.1  | 1.4  | 1.2  |
| OsAffx.17259.1.S1_s_at  | LOC_Os08g31090 | expressed protein                                          | 2.9  | 3.9  | 3.2  |
| OsAffx.18426.1.S1_x_at  | LOC_Os10g28160 | expressed protein                                          | 3.4  | 1.5  | 1    |
| OsAffx.21743.1.S1_s_at  | LOC_Os12g35470 | expressed protein                                          | 4.5  | 5    | 7    |
| OsAffx.22594.1.S1_x_at  | LOC_Os06g03810 | expressed protein                                          | 1.2  | 5.4  | 1.2  |
| OsAffx.22999.1.S1_at    | LOC_Os07g32710 | retrotransposon protein, putative, unclassified, expressed | 8    | 7.9  | 8.6  |
| OsAffx.23070.1.S1_at    | LOC_Os01g03130 | expressed protein                                          | 1.6  | 1.8  | 1.3  |
| OsAffx.2403.1.S1_at     | LOC_Os01g64440 | expressed protein                                          | 4.6  | 3    | 2.7  |
| OsAffx.24369.13.S1_s_at | LOC_Os01g49370 | expressed protein                                          | 4.3  | 2    | 2    |
| OsAffx.24726.1.S1_s_at  | LOC_Os02g44710 | expressed protein                                          | 1.6  | 1.6  | 1.6  |
| OsAffx.25199.1.S1_at    | LOC_Os03g22960 | expressed protein                                          | -1.5 | -1.1 | -1.3 |
| OsAffx.25907.1.S1_x_at  | LOC_Os04g07280 | AGAP002737-PA, putative, expressed                         | 1.6  | 2.1  | 2    |
| OsAffx.25914.1.S1_at    | LOC_Os04g07830 | expressed protein                                          | 1.4  | 2.4  | 2.3  |
| OsAffx.27605.1.S1_s_at  | LOC_Os06g13190 | expressed protein                                          | 2.4  | 2.3  | 2.5  |
| OsAffx.28294.3.S1_x_at  | LOC_Os05g36240 | expressed protein                                          | 2.9  | 2.5  | 2.6  |
| OsAffx.29773.1.S1_at    | LOC_Os09g09210 | expressed protein                                          | 6.8  | 6.6  | 6    |
| OsAffx.30041.1.S1_at    | LOC_Os09g26530 | expressed protein                                          | 1.8  | 1.8  | 2.2  |
| OsAffx.31986.1.S1_at    | LOC_Os12g32610 | expressed protein                                          | 2.2  | 2.6  | 1.7  |
| OsAffx.32172.1.S1_s_at  | LOC_Os12g43580 | expressed protein                                          | 3.7  | 3.5  | 5    |

|                       |                |                                                        |      |      |      |
|-----------------------|----------------|--------------------------------------------------------|------|------|------|
| OsAffx.3652.1.S1_at   | LOC_Os03g60210 | DUF567 domain containing protein, putative, expressed  | 3    | 1.9  | 1.8  |
| OsAffx.3970.1.S1_at   | LOC_Os04g31760 | expressed protein                                      | -1.3 | -1.8 | -2.2 |
| OsAffx.4103.1.S1_s_at | LOC_Os04g45940 | transcription factor like protein, putative, expressed | 1.2  | 1    | 1.2  |
| OsAffx.4280.2.A1_at   | LOC_Os05g08910 | expressed protein                                      | 4    | 5    | 2    |
| OsAffx.5568.1.S1_at   | LOC_Os07g38630 | expressed protein                                      | 2.3  | 2.5  | 1.9  |
| OsAffx.6035.1.S1_at   | LOC_Os08g35580 | expressed protein                                      | 4.8  | 2.2  | 1.7  |

1 Note: Fold=Signal Log<sub>2</sub> Ratio. Positive values mean gene up-regulation in G316 compared with TP309, or vice versa.
